# Supplementary material for: Multiscale modeling of heat and mass transfer in dry snow: influence of the condensation coefficient and comparison with experiments
Source: Copernicus journal article supplement (doi:10.5194/tc-2023-148), 2023-11-09
Supplement: Supplementary file 1 [file tc-2023-148-supplement.pdf]

# Supplement of “Multiscale modeling of heat and mass transfer in dry snow: influence of the condensation coefficient and comparison with experiments”

Lisa Bouvet<sup>1,2</sup>, Neige Calonne<sup>1</sup>, Frédéric Flin<sup>1</sup>, and Christian Geindreau<sup>2</sup>

<sup>1</sup>Univ. Grenoble Alpes, Université de Toulouse, Météo-France, CNRS, CNRM, Centre d’Études de la Neige, Grenoble, France

<sup>2</sup>Université Grenoble Alpes, CNRS, Grenoble INP, 3SR, Grenoble, France

**Correspondence:** Lisa Bouvet (lisa.bouvet@univ-grenoble-alpes.fr)

## S.1 Case A

Taking into account of the order of magnitude of the dimensionless numbers,  $[F_i^T] = \mathcal{O}([F_a^T]) = \mathcal{O}([F_a^\rho]) = \mathcal{O}(\varepsilon^2)$ ,  $[K] = \mathcal{O}(1)$ ,  $[H] = \mathcal{O}(\varepsilon^2)$ ,  $[W_R] = \mathcal{O}(\varepsilon^2)$ , the dimensionless microscopic description (13)-(18) becomes:

$$\varepsilon^2 \rho_i^* C_i^* \frac{\partial T_i^*}{\partial t^*} - \text{div}^*(k_i^* \mathbf{grad}^* T_i^*) = 0 \quad \text{in } \Omega_i \quad (\text{A.1})$$

5

$$\varepsilon^2 \rho_a^* C_a^* \frac{\partial T_a^*}{\partial t^*} - \text{div}^*(k_a^* \mathbf{grad}^* T_a^*) = 0 \quad \text{in } \Omega_a \quad (\text{A.2})$$

$$\varepsilon^2 \frac{\partial \rho_v^*}{\partial t^*} - \text{div}^*(D_v^* \mathbf{grad}^* \rho_v^*) = 0 \quad \text{in } \Omega_a \quad (\text{A.3})$$

$$10 \quad T_i^* = T_a^* \quad \text{on } \Gamma \quad (\text{A.4})$$

$$k_i^* \mathbf{grad}^* T_i^* \cdot \mathbf{n}_i - k_a^* \mathbf{grad}^* T_a^* \cdot \mathbf{n}_i = \varepsilon^2 L_{sg}^* \mathbf{w}^* \cdot \mathbf{n}_i \quad \text{on } \Gamma \quad (\text{A.5})$$

$$D_v^* \mathbf{grad}^* \rho_v^* \cdot \mathbf{n}_i = \varepsilon^2 \rho_i^* \mathbf{w}^* \cdot \mathbf{n}_i \quad \text{on } \Gamma. \quad (\text{A.6})$$

15 This set of equations is completed by the Hertz-Knudsen equation (10) and the Clausius Clapeyron’s law (9) expressed in dimensionless form as:

$$w_n^* = \mathbf{w}^* \cdot \mathbf{n}_i = \frac{\alpha^*}{\rho_i^*} w_k^* [\rho_v^* - \rho_{vs}^*(T_a^*)] \quad \text{on } \Gamma \quad (\text{A.7})$$

$$\rho_{vs}^*(T_a^*) = \rho_{vs}^{\text{ref}*}(T^{\text{ref}*}) \exp \left[ \frac{L_{sg}^* m^*}{\rho_i^* k^*} \left( \frac{1}{T^{\text{ref}*}} - \frac{1}{T_a^*} \right) \right] \quad (\text{A.8})$$

### 20 S.1.1 Heat transfer

Introducing asymptotic expansions for  $T_i^*$  and  $T_a^*$  in the relations (A.1), (A.2), (A.4), (A.5) gives at the lowest order:

$$\text{div}_{y^*}(k_i^* \mathbf{grad}_{y^*} T_i^{*(0)}) = 0 \quad \text{in } \Omega_i \quad (\text{A.9})$$

$$\text{div}_{y^*}(k_a^* \mathbf{grad}_{y^*} T_a^{*(0)}) = 0 \quad \text{in } \Omega_a \quad (\text{A.10})$$

25

$$T_i^{*(0)} = T_a^{*(0)} \quad \text{on } \Gamma \quad (\text{A.11})$$

$$(k_i^* \mathbf{grad}_{y^*} T_i^{*(0)} - k_a^* \mathbf{grad}_{y^*} T_a^{*(0)}) \cdot \mathbf{n}_i = 0 \quad \text{on } \Gamma \quad (\text{A.12})$$

where the unknowns  $T_i^{*(0)}(\mathbf{x}^*, \mathbf{y}^*, t)$  and  $T_a^{*(0)}(\mathbf{x}^*, \mathbf{y}^*, t)$  are  $\mathbf{y}^*$ -periodic. It can be shown that the obvious solution of the above boundary value problem is given by:

$$T_i^{*(0)} = T_a^{*(0)} = T^{*(0)}(\mathbf{x}^*, t). \quad (\text{A.13})$$

At the first order, the temperature is independent of the microscopic dimensionless variable  $\mathbf{y}^*$ , i.e. we have only one temperature field. Taking into account of these results, equations (A.1), (A.2), (A.4), and (A.5) of order  $\varepsilon$  give the following second-order problem:

$$35 \quad \text{div}_{y^*}(k_i^* (\mathbf{grad}_{y^*} T_i^{*(1)} + \mathbf{grad}_{x^*} T^{*(0)})) = 0 \quad \text{in } \Omega_i \quad (\text{A.14})$$

$$\text{div}_{y^*}(k_a^* (\mathbf{grad}_{y^*} T_a^{*(1)} + \mathbf{grad}_{x^*} T^{*(0)})) = 0 \quad \text{in } \Omega_a \quad (\text{A.15})$$

$$T_i^{*(1)} = T_a^{*(1)} \quad \text{on } \Gamma \quad (\text{A.16})$$

40

$$(k_i^* (\mathbf{grad}_{y^*} T_i^{*(1)} + \mathbf{grad}_{x^*} T^{*(0)}) - k_a^* (\mathbf{grad}_{y^*} T_a^{*(1)} + \mathbf{grad}_{x^*} T^{*(0)})) \cdot \mathbf{n}_i = 0 \quad \text{on } \Gamma \quad (\text{A.17})$$

where the unknowns  $T_i^{*(1)}(\mathbf{x}^*, \mathbf{y}^*, t)$  and  $T_a^{*(1)}(\mathbf{x}^*, \mathbf{y}^*, t)$  are  $\mathbf{y}^*$ -periodic and the macroscopic gradient  $\mathbf{grad}_{x^*} T^{*(0)}$  is given. The solution of the above boundary value problem appears as a linear function of the macroscopic gradient, modulo an arbitrary function  $\tilde{T}^{*(1)}(\mathbf{x}^*, t)$ :

$$45 \quad T_i^{*(1)}(\mathbf{x}^*, \mathbf{y}^*, t) = \mathbf{t}_i^*(\mathbf{y}^*) \cdot \mathbf{grad}_{x^*} T^{*(0)} + \tilde{T}_i^{*(1)} \quad (\text{A.18})$$

$$T_a^{*(1)}(\mathbf{x}^*, \mathbf{y}^*, t) = \mathbf{t}_a^*(\mathbf{y}^*) \cdot \mathbf{grad}_{x^*} T^{*(0)} + \tilde{T}_a^{*(1)} \quad (\text{A.19})$$

where  $\mathbf{t}_i^*(\mathbf{y}^*)$  and  $\mathbf{t}_a^*(\mathbf{y}^*)$  are two periodic vectors which characterize the fluctuation of temperature in both phases at the pore scale. Introducing (A.18) and (A.19) in the set (A.14)-(A.17), these two vectors are solution of the following boundary value problem, expressed in a compact form as:

$$\text{div}_{y^*}(k_i^*(\mathbf{grad}_{y^*} \mathbf{t}_i^* + \mathbf{I})) = 0 \quad \text{in } \Omega_i \quad (\text{A.20})$$

$$\text{div}_{y^*}(k_a^*(\mathbf{grad}_{y^*} \mathbf{t}_a^* + \mathbf{I})) = 0 \quad \text{in } \Omega_a \quad (\text{A.21})$$

$$55 \quad \mathbf{t}_i^* = \mathbf{t}_a^* \quad \text{on } \Gamma \quad (\text{A.22})$$

$$(k_i^*(\mathbf{grad}_{y^*} \mathbf{t}_i^* + \mathbf{I}) - k_a^*(\mathbf{grad}_{y^*} \mathbf{t}_a^* + \mathbf{I})) \cdot \mathbf{n}_i = 0 \quad \text{on } \Gamma \quad (\text{A.23})$$

$$\frac{1}{|\Omega|} \int_{\Omega} (\mathbf{t}_a^* + \mathbf{t}_i^*) d\Omega = \mathbf{0} \quad (\text{A.24})$$

60 This latter equation is introduced to ensure the uniqueness of the solution. Finally, the third order problem is given by the Eq. (A.1), (A.2), (A.4), and (A.5) of order  $\varepsilon^2$ :

$$\rho_i^* C_i^* \frac{\partial T^{*(0)}}{\partial t^*} - \text{div}_{y^*}(k_i^*(\mathbf{grad}_{y^*} T_i^{*(2)} + \mathbf{grad}_{x^*} T_i^{*(1)})) - \text{div}_{x^*}(k_i^*(\mathbf{grad}_{y^*} T_i^{*(1)} + \mathbf{grad}_{x^*} T^{*(0)})) = 0 \quad \text{in } \Omega_i \quad (\text{A.25})$$

$$\rho_a^* C_a^* \frac{\partial T^{*(0)}}{\partial t^*} - \text{div}_{y^*}(k_a^*(\mathbf{grad}_{y^*} T_a^{*(2)} + \mathbf{grad}_{x^*} T_a^{*(1)})) - \text{div}_{x^*}(k_a^*(\mathbf{grad}_{y^*} T_a^{*(1)} + \mathbf{grad}_{x^*} T^{*(0)})) = 0 \quad \text{in } \Omega_a \quad (\text{A.26})$$

$$65 \quad T_i^{*(2)} = T_a^{*(2)} \quad \text{on } \Gamma \quad (\text{A.27})$$

$$(k_i^*(\mathbf{grad}_{y^*} T_i^{*(2)} + \mathbf{grad}_{x^*} T_i^{*(1)}) - k_a^*(\mathbf{grad}_{y^*} T_a^{*(2)} + \mathbf{grad}_{x^*} T_a^{*(1)})) \cdot \mathbf{n}_i = w_n^{*(0)} \quad \text{on } \Gamma \quad (\text{A.28})$$

70 where the unknowns  $T_i^{*(2)}(\mathbf{x}^*, \mathbf{y}^*, t)$  and  $T_a^{*(2)}(\mathbf{x}^*, \mathbf{y}^*, t)$  are  $\mathbf{y}^*$ -periodic and  $w_n^{*(0)}$  is the normal interface velocity due to the sublimation-deposition process given, at the zero order, by the Hertz-Knudsen equation (A.7) and the Clausius Clapeyron's law (A.8).

### S.1.2 Water vapor transfer

Introducing asymptotic expansions for  $\rho_v^*$  in the relations (A.3) and (A.6) gives at the lowest order:

$$\text{div}_{y^*}(D_v^* \mathbf{grad}_{y^*} \rho_v^{*(0)}) = 0 \quad \text{in } \Omega_a \quad (\text{A.29})$$

75

$$D_v^* \mathbf{grad}_{y^*} \rho_v^{*(0)} \cdot \mathbf{n}_i = 0 \quad \text{on } \Gamma. \quad (\text{A.30})$$

where the unknown  $\rho_v^{*(0)}(\mathbf{x}^*, \mathbf{y}^*, t)$  is  $\mathbf{y}^*$ -periodic. It can be shown (Auriault et al., 2009) that the solution of the above boundary value problem is given by:

$$\rho_v^{*(0)} = \rho_v^{*(0)}(\mathbf{x}^*, t). \quad (\text{A.31})$$

80 At the first order, the water vapor density is independent of the microscopic dimensionless variable  $\mathbf{y}^*$ . Taking into account of these results, the second-order problem is given by Eq. (A.3) and (A.6) of order  $\varepsilon$ , which are:

$$\text{div}_{y^*}(D_v^*(\mathbf{grad}_{y^*} \rho_v^{*(1)} + \mathbf{grad}_{x^*} \rho_v^{*(0)})) = 0 \quad \text{in } \Omega_a \quad (\text{A.32})$$

$$D_v^*(\mathbf{grad}_{y^*} \rho_v^{*(1)} + \mathbf{grad}_{x^*} \rho_v^{*(0)}) \cdot \mathbf{n}_i = 0 \quad \text{on } \Gamma. \quad (\text{A.33})$$

85 where the unknown  $\rho_v^{*(1)}(\mathbf{x}^*, \mathbf{y}^*, t)$  is  $\mathbf{y}^*$ -periodic and the macroscopic gradient  $\mathbf{grad}_{x^*} \rho_v^{*(0)}$  is given. The solution of the above boundary value problem appears as a linear function of the macroscopic gradient, modulo an arbitrary function  $\tilde{\rho}_v^{*(1)}(\mathbf{x}^*, t)$  (Auriault et al., 2009):

$$\rho_v^{*(1)}(\mathbf{x}^*, \mathbf{y}^*, t) = \mathbf{g}_v^*(\mathbf{y}^*) \cdot \mathbf{grad}_{x^*} \rho_v^{*(0)} + \tilde{\rho}_v^{*(1)}(\mathbf{x}^*, t) \quad (\text{A.34})$$

where  $\mathbf{g}_v^*(\mathbf{y}^*)$  is a periodic vector which characterizes the fluctuation of water vapor density in the air phase at the pore scale.

90 Introducing (A.34) in the set (A.32)-(A.33), this vector is solution of the following boundary value problem, expressed in a compact form:

$$\text{div}_{y^*}(D_v^*(\mathbf{grad}_{y^*} \mathbf{g}_v^* + \mathbf{I})) = 0 \quad \text{in } \Omega_a \quad (\text{A.35})$$

$$D_v^*(\mathbf{grad}_{y^*} \mathbf{g}_v^* + \mathbf{I}) \cdot \mathbf{n}_i = 0 \quad \text{on } \Gamma \quad (\text{A.36})$$

95

$$\frac{1}{|\Omega|} \int_{\Omega_a} \mathbf{g}_v^* d\Omega = \mathbf{0} \quad (\text{A.37})$$

This latter equation is introduced to ensure the uniqueness of the solution. Finally, the third order problem is given by Eq. (A.3) and (A.6) of order  $\varepsilon^2$ :

$$\frac{\partial \rho_v^{*(0)}}{\partial t^*} - \text{div}_{y^*} (D_v^*(\mathbf{grad}_{y^*} \rho_v^{*(2)} + \mathbf{grad}_{x^*} \rho_v^{*(1)})) - \text{div}_{x^*} (D_v^*(\mathbf{grad}_{y^*} \rho_v^{*(1)} + \mathbf{grad}_{x^*} \rho_v^{*(0)})) = 0 \quad \text{in } \Omega_a \quad (\text{A.38})$$

100

$$D_v^*(\mathbf{grad}_{y^*} \rho_v^{*(2)} + \mathbf{grad}_{x^*} \rho_v^{*(1)}) \cdot \mathbf{n}_i = w_n^{*(0)} \quad \text{on } \Gamma \quad (\text{A.39})$$

where the unknown  $\rho_v^{*(2)}(\mathbf{x}^*, \mathbf{y}^*, t)$  is  $\mathbf{y}^*$ -periodic and  $w_n^{*(0)}$  is the normal interface velocity due to the sublimation/deposition process given, at the zero order, by the Hertz-Knudsen equation (A.7) and the Clausius Clapeyron's law (A.8). Taking into account the above results, we have:

$$105 \quad \rho_{vs}^*(T_a^*) = \rho_{vs}^{\text{ref}*}(T^{\text{ref}*}) \exp \left[ \frac{L_{sg}^* m^*}{\rho_i^* k^*} \left( \frac{1}{T^{\text{ref}*}} - \frac{1}{T^{*(0)}} \right) \right] \left( 1 + \varepsilon \frac{L_{sg}^* m^*}{\rho_i^* k^*} \frac{T_a^{*(1)}}{(T^{*(0)})^2} + \dots \right) \quad (\text{A.40})$$

This relation shows that the asymptotic development of the Clausius-Clapeyron's law is written:

$$\rho_{vs}^*(T_a^*) = \rho_{vs}^{*(0)}(\mathbf{x}^*, t) + \varepsilon \rho_{vs}^{*(1)}(\mathbf{x}^*, \mathbf{y}^*, t) + \dots \quad (\text{A.41})$$

where the first term  $\rho_{vs}^{*(0)}$ , which depends on  $T^{*(0)}(\mathbf{x}^*, t)$  only, is defined as:

$$\rho_{vs}^{*(0)}(T^{*(0)}) = \rho_{vs}^{\text{ref}*}(T^{\text{ref}*}) \exp \left[ \frac{L_{sg}^* m^*}{\rho_i^* k^*} \left( \frac{1}{T^{\text{ref}*}} - \frac{1}{T^{*(0)}} \right) \right] \quad (\text{A.42})$$

110 The relation (A.42) shows that the normal velocity  $w_n^{*(0)}$  arising in the boundary condition (A.39) does not depend on  $\mathbf{y}^*$ . From (A.7),  $w_n^{*(0)}$  is also written:

$$w_n^{*(0)} = \frac{\alpha^*}{\rho_i^*} w_k^* \left[ \rho_v^{*(0)} - \rho_{vs}^{*(0)}(T^{*(0)}) \right] \quad (\text{A.43})$$

### S.1.3 Macroscopic description

115 Integrating (A.25) over  $\Omega_i$  and (A.26) over  $\Omega_a$ , and then using the divergence theorem, the periodicity condition, and the boundary conditions (A.28) leads to the first order dimensionless description:

$$(\rho C)^{\text{eff}*} \frac{\partial T^{*(0)}}{\partial t^*} - \text{div}_{x^*} (\mathbf{k}^{\text{eff}*} \mathbf{grad}_{x^*} T^{*(0)}) = \text{SSA}_{\sqrt{}} L_{sg}^* w_n^{*(0)} \quad (\text{A.44})$$

where  $SSA_V = |\Gamma|/|\Omega|$  is the specific surface area and where  $(\rho C)^{\text{eff}*}$  and  $\mathbf{k}^{\text{eff}*}$  are the dimensionless effective thermal capacity and the effective dimensionless thermal conductivity, respectively, defined as:

$$(\rho C)^{\text{eff}*} = (1 - \phi)\rho_i^* C_i^* + \phi\rho_a^* C_a^* \quad (\text{A.45})$$

120

$$\mathbf{k}^{\text{eff}*} = \frac{1}{|\Omega|} \left( \int_{\Omega_a} k_a^* (\mathbf{grad}_{y^*} \mathbf{t}_a^*(\mathbf{y}^*) + \mathbf{I}) d\Omega + \int_{\Omega_i} k_i^* (\mathbf{grad}_{y^*} \mathbf{t}_i^*(\mathbf{y}^*) + \mathbf{I}) d\Omega \right) \quad (\text{A.46})$$

where  $\phi$  is the porosity. Consequently, integrating (A.38) over  $\Omega_a$ , and then using the divergence theorem, the periodicity condition, and the boundary conditions (A.39) leads to the first order dimensionless description:

$$\phi \frac{\partial \rho_v^{*(0)}}{\partial t} - \text{div}_{x^*} (\mathbf{D}^{\text{eff}*} \mathbf{grad}_{x^*} \rho_v^{*(0)}) = -SSA_V \rho_i^* w_n^{*(0)} \quad (\text{A.47})$$

125 where  $\mathbf{D}^{\text{eff}*}$  is the dimensionless effective diffusion tensor defined as:

$$\mathbf{D}^{\text{eff}*} = \frac{1}{|\Omega|} \int_{\Omega_a} D_v^* (\mathbf{grad}_{y^*} \mathbf{g}_v^*(\mathbf{y}^*) + \mathbf{I}) d\Omega \quad (\text{A.48})$$

## S.2 Case B1 and B2

### S.2.1 Case B1

130 Taking into account of the order of magnitude of the dimensionless numbers,  $[F_i^T] = \mathcal{O}([F_a^T]) = \mathcal{O}([F_a^p]) = \mathcal{O}(\varepsilon^2)$ ,  $[K] = \mathcal{O}(1)$ ,  $[H] = \mathcal{O}(\varepsilon)$ ,  $[W_R] = \mathcal{O}(\varepsilon)$ , the dimensionless microscopic description (13)-(18) becomes:

$$\varepsilon^2 \rho_i^* C_i^* \frac{\partial T_i^*}{\partial t^*} - \text{div}^* (k_i^* \mathbf{grad}^* T_i^*) = 0 \quad \text{in } \Omega_i \quad (\text{B1.1})$$

$$\varepsilon^2 \rho_a^* C_a^* \frac{\partial T_a^*}{\partial t^*} - \text{div}^* (k_a^* \mathbf{grad}^* T_a^*) = 0 \quad \text{in } \Omega_a \quad (\text{B1.2})$$

$$135 \quad \varepsilon^2 \frac{\partial \rho_v^*}{\partial t^*} - \text{div}^* (D_v^* \mathbf{grad}^* \rho_v^*) = 0 \quad \text{in } \Omega_a \quad (\text{B1.3})$$

$$T_i^* = T_a^* \quad \text{on } \Gamma \quad (\text{B1.4})$$

$$k_i^* \mathbf{grad}^* T_i^* \cdot \mathbf{n}_i - k_a^* \mathbf{grad}^* T_a^* \cdot \mathbf{n}_i = \varepsilon L_{sg}^* \mathbf{w}^* \cdot \mathbf{n}_i \quad \text{on } \Gamma \quad (\text{B1.5})$$

$$D_v^* \mathbf{grad}^* \rho_v^* \cdot \mathbf{n}_i = \varepsilon \rho_i^* \mathbf{w}^* \cdot \mathbf{n}_i \quad \text{on } \Gamma. \quad (\text{B1.6})$$

This set of equations is completed by the Hertz-Knudsen equation (10) and the Clausius Clapeyron's law (9) expressed in dimensionless form as:

$$w_n^* = \mathbf{w}^* \cdot \mathbf{n}_i = \frac{\alpha^*}{\rho_i^*} w_k^* [\rho_v^* - \rho_{vs}^*(T_a^*)] \quad \text{on } \Gamma \quad (\text{B1.7})$$

$$\rho_{vs}^*(T_a^*) = \rho_{vs}^{\text{ref}*}(T^{\text{ref}*}) \exp \left[ \frac{L_{sg}^* m^*}{\rho_i^* k^*} \left( \frac{1}{T^{\text{ref}*}} - \frac{1}{T_a^*} \right) \right] \quad (\text{B1.8})$$

### S.2.1.1 Heat transfer

Introducing asymptotic expansions for  $T_i^*$  and  $T_a^*$  in the relations (B1.1), (B1.2), (B1.4), and (B1.5) gives at the lowest order:

$$\text{div}_{y^*} (k_i^* \mathbf{grad}_{y^*} T_i^{*(0)}) = 0 \quad \text{in } \Omega_i \quad (\text{B1.9})$$

$$\text{div}_{y^*} (k_a^* \mathbf{grad}_{y^*} T_a^{*(0)}) = 0 \quad \text{in } \Omega_a \quad (\text{B1.10})$$

$$T_i^{*(0)} = T_a^{*(0)} \quad \text{on } \Gamma \quad (\text{B1.11})$$

$$155 \quad (k_i^* \mathbf{grad}_{y^*} T_i^{*(0)} - k_a^* \mathbf{grad}_{y^*} T_a^{*(0)}) \cdot \mathbf{n}_i = 0 \quad \text{on } \Gamma \quad (\text{B1.12})$$

where the unknowns  $T_i^{*(0)}(\mathbf{x}^*, \mathbf{y}^*, t)$  and  $T_a^{*(0)}(\mathbf{x}^*, \mathbf{y}^*, t)$  are  $\mathbf{y}^*$ -periodic. It can be shown Auriault et al. (2009) that the obvious solution of the above boundary value problem is given by:

$$T_i^{*(0)} = T_a^{*(0)} = T^{*(0)}(\mathbf{x}^*, t). \quad (\text{B1.13})$$

At the first order, the temperature is independent of the microscopic dimensionless variable  $\mathbf{y}^*$ , i.e. we have only one temperature field. Taking into account of these results, Eq. (B1.1), (B1.2), (B1.4), and (B1.5) of order  $\varepsilon$  give the following second-order problem:

$$160 \quad \text{div}_{y^*} (k_i^* (\mathbf{grad}_{y^*} T_i^{*(1)} + \mathbf{grad}_{x^*} T^{*(0)})) = 0 \quad \text{in } \Omega_i \quad (\text{B1.14})$$

$$\text{div}_{y^*} (k_a^* (\mathbf{grad}_{y^*} T_a^{*(1)} + \mathbf{grad}_{x^*} T^{*(0)})) = 0 \quad \text{in } \Omega_a \quad (\text{B1.15})$$

$$T_i^{*(1)} = T_a^{*(1)} \quad \text{on } \Gamma \quad (\text{B1.16})$$

$$(k_i^*(\mathbf{grad}_{y^*} T_i^{*(1)} + \mathbf{grad}_{x^*} T^{*(0)}) - k_a^*(\mathbf{grad}_{y^*} T_a^{*(1)} + \mathbf{grad}_{x^*} T^{*(0)})) \cdot \mathbf{n}_i = L_{sg}^* w_n^{*(0)} \quad \text{on } \Gamma \quad (\text{B1.17})$$

where the unknowns  $T_i^{*(1)}(\mathbf{x}^*, \mathbf{y}^*, t)$  and  $T_a^{*(1)}(\mathbf{x}^*, \mathbf{y}^*, t)$  are  $\mathbf{y}^*$ -periodic and the macroscopic gradient  $\mathbf{grad}_{x^*} T^{*(0)}$  is given. Moreover, it can be shown that at the first order  $w_n^{*(0)} = 0$  (see B1.37). As in the case A, the solution of the above boundary value problem appears as a linear function of the macroscopic gradient, modulo an arbitrary function  $\tilde{T}^{*(1)}(\mathbf{x}^*, t)$  Auriault et al. (2009):

$$T_i^{*(1)}(\mathbf{x}^*, \mathbf{y}^*, t) = \mathbf{t}_i^*(\mathbf{y}^*) \cdot \mathbf{grad}_{x^*} T^{*(0)} + \tilde{T}_i^{*(1)} \quad (\text{B1.18})$$

$$T_a^{*(1)}(\mathbf{x}^*, \mathbf{y}^*, t) = \mathbf{t}_a^*(\mathbf{y}^*) \cdot \mathbf{grad}_{x^*} T^{*(0)} + \tilde{T}_a^{*(1)} \quad (\text{B1.19})$$

where  $\mathbf{t}_i^*(\mathbf{y}^*)$  and  $\mathbf{t}_a^*(\mathbf{y}^*)$  are two periodic vectors which characterize the fluctuation of temperature in both phases at the pore scale. Introducing (B1.18) and (B1.19) in the set (B1.14)-(B1.17), these two vectors are solution of the following boundary value problem in a compact form:

$$\text{div}_{y^*} (k_i^*(\mathbf{grad}_{y^*} \mathbf{t}_i^* + \mathbf{I})) = 0 \quad \text{in } \Omega_i \quad (\text{B1.20})$$

180

$$\text{div}_{y^*} (k_a^*(\mathbf{grad}_{y^*} \mathbf{t}_a^* + \mathbf{I})) = 0 \quad \text{in } \Omega_a \quad (\text{B1.21})$$

$$\mathbf{t}_i^* = \mathbf{t}_a^* \quad \text{on } \Gamma \quad (\text{B1.22})$$

$$(k_i^*(\mathbf{grad}_{y^*} \mathbf{t}_i^* + \mathbf{I}) - k_a^*(\mathbf{grad}_{y^*} \mathbf{t}_a^* + \mathbf{I})) \cdot \mathbf{n}_i = 0 \quad \text{on } \Gamma \quad (\text{B1.23})$$

$$\frac{1}{|\Omega|} \int_{\Omega} (\mathbf{t}_a^* + \mathbf{t}_i^*) d\Omega = \mathbf{0} \quad (\text{B1.24})$$

This latter equation is introduced to ensure the uniqueness of the solution. Finally, the third order problem is given by Eq. (B1.1), (B1.2), (B1.4), and (B1.5) of order  $\varepsilon^2$ :

$$\rho_i^* C_i^* \frac{\partial T^{*(0)}}{\partial t^*} - \text{div}_{y^*} (k_i^*(\mathbf{grad}_{y^*} T_i^{*(2)} + \mathbf{grad}_{x^*} T_i^{*(1)})) - \text{div}_{x^*} (k_i^*(\mathbf{grad}_{y^*} T_i^{*(1)} + \mathbf{grad}_{x^*} T^{*(0)})) = 0 \quad \text{in } \Omega_i \quad (\text{B1.25})$$



$$\rho_a^* C_a^* \frac{\partial T^{*(0)}}{\partial t^*} - \operatorname{div}_{y^*} (k_a^* (\mathbf{grad}_{y^*} T_a^{*(2)} + \mathbf{grad}_{x^*} T_a^{*(1)})) - \operatorname{div}_{x^*} (k_a^* (\mathbf{grad}_{y^*} T_a^{*(1)} + \mathbf{grad}_{x^*} T^{*(0)})) = 0 \quad \text{in } \Omega_a \quad (\text{B1.26})$$

$$T_i^{*(2)} = T_a^{*(2)} \quad \text{on } \Gamma \quad (\text{B1.27})$$

195

$$(k_i^* (\mathbf{grad}_{y^*} T_i^{*(2)} + \mathbf{grad}_{x^*} T_i^{*(1)}) - k_a^* (\mathbf{grad}_{y^*} T_a^{*(2)} + \mathbf{grad}_{x^*} T_a^{*(1)})) \cdot \mathbf{n}_i = L_{sg}^* w_n^{*(1)} \quad \text{on } \Gamma \quad (\text{B1.28})$$

where the unknowns  $T_i^{*(2)}(\mathbf{x}^*, \mathbf{y}^*, t)$  and  $T_a^{*(2)}(\mathbf{x}^*, \mathbf{y}^*, t)$  are  $\mathbf{y}^*$ -periodic. Integrating (B1.25) over  $\Omega_i$  and (B1.26) over  $\Omega_a$ , and then using the divergence theorem, the periodicity condition, and the boundary conditions (B1.28) leads to the first order dimensionless description:

$$200 \quad (\rho C)^{\text{eff}*} \frac{\partial T^{*(0)}}{\partial t^*} - \operatorname{div}_{x^*} (\mathbf{k}^{\text{eff}*} \mathbf{grad}_{x^*} T^{*(0)}) = \int_{\Gamma} L_{sg}^* w_n^{*(1)} dS = -L_{sg}^* \dot{\phi} \quad (\text{B1.29})$$

where  $(\rho C)^{\text{eff}*}$  and  $\mathbf{k}^{\text{eff}*}$  are the dimensionless effective thermal capacity and the effective dimensionless thermal conductivity respectively, defined, as in the Case A, by:

$$(\rho C)^{\text{eff}*} = (1 - \phi) \rho_i^* C_i^* + \phi \rho_a^* C_a^* \quad (\text{B1.30})$$

$$205 \quad \mathbf{k}^{\text{eff}*} = \frac{1}{|\Omega|} \left( \int_{\Omega_a} k_a^* (\mathbf{grad}_{y^*} \mathbf{t}_a^*(\mathbf{y}^*) + \mathbf{I}) d\Omega + \int_{\Omega_i} k_i^* (\mathbf{grad}_{y^*} \mathbf{t}_i^*(\mathbf{y}^*) + \mathbf{I}) d\Omega \right) \quad (\text{B1.31})$$

where  $\phi$  is the porosity.

### S.2.1.2 Water vapor transfer

Introducing asymptotic expansions for  $\rho_v^*$  in the relations (B1.3) and (B1.6) gives at the lowest order:

$$\operatorname{div}_{y^*} (D_v^* \mathbf{grad}_{y^*} \rho_v^{*(0)}) = 0 \quad \text{in } \Omega_a \quad (\text{B1.32})$$

210

$$D_v^* \mathbf{grad}_{y^*} \rho_v^{*(0)} \cdot \mathbf{n}_i = 0 \quad \text{on } \Gamma. \quad (\text{B1.33})$$

where the unknown  $\rho_v^{*(0)}(\mathbf{x}^*, \mathbf{y}^*, t)$  is  $\mathbf{y}^*$ -periodic. It can be shown Auriault et al. (2009) that the solution of the above boundary value problem is given by:

$$\rho_v^{*(0)} = \rho_v^{*(0)}(\mathbf{x}^*, t). \quad (\text{B1.34})$$

215 At the first order, the water vapor density is independent of the microscopic dimensionless variable  $\mathbf{y}^*$ . Taking into account of these results, the second-order problem is given by Eq. (B1.3) and (B1.6) of order  $\varepsilon$ :

$$\operatorname{div}_{\mathbf{y}^*}(D_v^*(\mathbf{grad}_{\mathbf{y}^*}\rho_v^{*(1)} + \mathbf{grad}_{\mathbf{x}^*}\rho_v^{*(0)})) = 0 \quad \text{in } \Omega_a \quad (\text{B1.35})$$

$$D_v^*(\mathbf{grad}_{\mathbf{y}^*}\rho_v^{*(1)} + \mathbf{grad}_{\mathbf{x}^*}\rho_v^{*(0)}) \cdot \mathbf{n}_i = \alpha w_k \left[ \rho_v^{*(0)} - \rho_{vs}^{*(0)}(T^{*(0)}) \right] \quad \text{on } \Gamma. \quad (\text{B1.36})$$

220 where the unknown  $\rho_v^{*(1)}(\mathbf{x}^*, \mathbf{y}^*, t)$  is  $\mathbf{y}^*$ -periodic. Consequently, integrating (B1.35) over  $\Omega_a$ , and then using the divergence theorem, the periodicity condition, the boundary conditions (B1.36) and the result (B1.34) leads to the first order dimensionless description:

$$\rho_v^{*(0)} = \rho_{vs}^{*(0)}(T^{*(0)}) \quad (\text{B1.37})$$

Consequently, as in the Case A, the solution of the above boundary value problem (B1.35) - (B1.36) appears as a linear function  
225 of the macroscopic gradient  $\mathbf{grad}_{\mathbf{x}^*}\rho_{vs}^{*(0)}(T^{*(0)})$  modulo an arbitrary function  $\tilde{\rho}_v^{*(1)}(\mathbf{x}^*, t)$ :

$$\rho_v^{*(1)}(\mathbf{x}^*, \mathbf{y}^*, t) = \mathbf{g}_v^*(\mathbf{y}^*) \cdot \mathbf{grad}_{\mathbf{x}^*}\rho_{vs}^{*(0)}(T^{*(0)}) + \tilde{\rho}_v^{*(1)}(\mathbf{x}^*, t) \quad (\text{B1.38})$$

where  $\mathbf{g}_v^*(\mathbf{y}^*)$  is a periodic vector which characterizes the fluctuation of water vapor density in the air phase at the pore scale induced by the macroscopic gradient  $\mathbf{grad}_{\mathbf{x}^*}\rho_{vs}^{*(0)}(T^{*(0)})$ . Introducing (B1.38) in the set (B1.35)-(B1.36), this vector is solution of the following boundary value problem in a compact form:

$$230 \operatorname{div}_{\mathbf{y}^*}(D_v^*(\mathbf{grad}_{\mathbf{y}^*}\mathbf{g}_v^* + \mathbf{I})) = 0 \quad \text{in } \Omega_a \quad (\text{B1.39})$$

$$D_v^*(\mathbf{grad}_{\mathbf{y}^*}\mathbf{g}_v^* + \mathbf{I}) \cdot \mathbf{n}_i = 0 \quad \text{on } \Gamma \quad (\text{B1.40})$$

$$\frac{1}{|\Omega|} \int_{\Omega_a} \mathbf{g}_v^* d\Omega = \mathbf{0} \quad (\text{B1.41})$$

235 This latter equation is introduced to ensure the uniqueness of the solution. Finally, the third order problem is given by Eq. (B1.3) and (B1.6) of order  $\varepsilon^2$ :

$$\frac{\partial \rho_{vs}^{*(0)}}{\partial t^*} - \operatorname{div}_{\mathbf{y}^*}(D_v^*(\mathbf{grad}_{\mathbf{y}^*}\rho_v^{*(2)} + \mathbf{grad}_{\mathbf{x}^*}\rho_v^{*(1)})) - \operatorname{div}_{\mathbf{x}^*}(D_v^*(\mathbf{grad}_{\mathbf{y}^*}\rho_v^{*(1)} + \mathbf{grad}_{\mathbf{x}^*}\rho_{vs}^{*(0)}(T^{*(0)}))) = 0 \quad \text{in } \Omega_i \quad (\text{B1.42})$$

$$D_v^*(\mathbf{grad}_{\mathbf{y}^*}\rho_v^{*(2)} + \mathbf{grad}_{\mathbf{x}^*}\rho_v^{*(1)}) \cdot \mathbf{n}_i = \rho_i^* w_n^{*(1)} \quad \text{on } \Gamma \quad (\text{B1.43})$$

240 where the unknowns  $\rho_v^{*(2)}(\mathbf{x}^*, \mathbf{y}^*, t)$  is  $\mathbf{y}^*$ -periodic and  $w_n^{*(1)}$  is the normal interface velocity due to the sublimation/deposition process at the first order. Consequently, integrating (B1.42) over  $\Omega_a$ , and then using the divergence theorem, the periodicity condition, and the boundary conditions (B1.43) leads to the first order dimensionless description:

$$\phi \frac{\partial \rho_{vs}^{*(0)}}{\partial t} - \text{div}_{x^*}(\mathbf{D}^{\text{eff}*} \mathbf{grad}_{x^*} \rho_{vs}^{*(0)}(T^{*(0)})) = \int_{\Gamma} \rho_i^* w_n^{*(1)} dS = \rho_i^* \dot{\phi} \quad (\text{B1.44})$$

where  $\mathbf{D}^{\text{eff}*}$  is the classical dimensionless effective diffusion tensor defined as (see Case A):

$$245 \quad \mathbf{D}^{\text{eff}*} = \frac{1}{|\Omega|} \int_{\Omega_a} D_v^*(\mathbf{grad}_{y^*} \mathbf{g}_v^*(\mathbf{y}^*) + \mathbf{I}) d\Omega \quad (\text{B1.45})$$

### S.2.2 Case B2

Taking into account of the order of magnitude of the dimensionless numbers,  $[F_i^T] = \mathcal{O}([F_a^T]) = \mathcal{O}([F_a^\rho]) = \mathcal{O}(\varepsilon^2)$ ,  $[K] = \mathcal{O}(1)$ ,  $[H] = \mathcal{O}(1)$ ,  $[W_R] = \mathcal{O}(1)$ , the dimensionless microscopic description (13)-(18) becomes:

$$\varepsilon^2 \rho_i^* C_i^* \frac{\partial T_i^*}{\partial t^*} - \text{div}^*(k_i^* \mathbf{grad}^* T_i^*) = 0 \quad \text{in } \Omega_i \quad (\text{B2.1})$$

250

$$\varepsilon^2 \rho_a^* C_a^* \frac{\partial T_a^*}{\partial t^*} - \text{div}^*(k_a^* \mathbf{grad}^* T_a^*) = 0 \quad \text{in } \Omega_a \quad (\text{B2.2})$$

$$\varepsilon^2 \frac{\partial \rho_v^*}{\partial t^*} - \text{div}^*(D_v^* \mathbf{grad}^* \rho_v^*) = 0 \quad \text{in } \Omega_a \quad (\text{B2.3})$$

$$255 \quad T_i^* = T_a^* \quad \text{on } \Gamma \quad (\text{B2.4})$$

$$k_i^* \mathbf{grad}^* T_i^* \cdot \mathbf{n}_i - k_a^* \mathbf{grad}^* T_a^* \cdot \mathbf{n}_i = L_{sg}^* \frac{D_v^*}{\rho_i^*} \mathbf{grad}^* \rho_v^* \cdot \mathbf{n}_i \quad \text{on } \Gamma \quad (\text{B2.5})$$

$$D_v^* \mathbf{grad}^* \rho_v^* \cdot \mathbf{n}_i = \rho_i^* \mathbf{w}^* \cdot \mathbf{n}_i \quad \text{on } \Gamma. \quad (\text{B2.6})$$

260 This set of equations is completed by the Hertz-Knudsen equation (A.7) and the Clausius Clapeyron's law (9) expressed in dimensionless form as:

$$w_n^* = \mathbf{w}^* \cdot \mathbf{n}_i = \frac{\alpha^*}{\rho_i^*} w_k^* [\rho_v^* - \rho_{vs}^*(T_a^*)] \quad \text{on } \Gamma \quad (\text{B2.7})$$

$$\rho_{vs}^*(T_a^*) = \rho_{vs}^{\text{ref}*}(T^{\text{ref}*}) \exp \left[ \frac{L_{sg}^* m^*}{\rho_i^* k^*} \left( \frac{1}{T^{\text{ref}*}} - \frac{1}{T_a^*} \right) \right] \quad (\text{B2.8})$$

265 **S.2.2.1 Heat and water vapor transfer at the first order**

Introducing asymptotic expansions for  $T_i^*$  and  $T_a^*$  in the relations (B2.1), (B2.2), (B2.4), and (B2.5) gives at the lowest order:

$$\operatorname{div}_{\mathbf{y}^*} (k_i^* \mathbf{grad}_{\mathbf{y}^*} T_i^{*(0)}) = 0 \quad \text{in } \Omega_i \quad (\text{B2.9})$$

$$\operatorname{div}_{\mathbf{y}^*} (k_a^* \mathbf{grad}_{\mathbf{y}^*} T_a^{*(0)}) = 0 \quad \text{in } \Omega_a \quad (\text{B2.10})$$

270

$$T_i^{*(0)} = T_a^{*(0)} \quad \text{on } \Gamma \quad (\text{B2.11})$$

$$(k_i^* \mathbf{grad}_{\mathbf{y}^*} T_i^{*(0)} - k_a^* \mathbf{grad}_{\mathbf{y}^*} T_a^{*(0)}) \cdot \mathbf{n}_i = \frac{L_{sg}^*}{\rho_i^*} D_v^* \mathbf{grad}_{\mathbf{y}^*} \rho_v^{*(0)} \cdot \mathbf{n}_i \quad \text{on } \Gamma \quad (\text{B2.12})$$

where the unknowns  $T_i^{*(0)}(\mathbf{x}^*, \mathbf{y}^*, t)$  and  $T_a^{*(0)}(\mathbf{x}^*, \mathbf{y}^*, t)$  are  $\mathbf{y}^*$ -periodic. Introducing asymptotic expansions for  $\rho_v^*$  in the relations (B2.3) and (B2.6) gives at the lowest order:

275

$$\operatorname{div}_{\mathbf{y}^*} (D_v^* \mathbf{grad}_{\mathbf{y}^*} \rho_v^{*(0)}) = 0 \quad \text{in } \Omega_a \quad (\text{B2.13})$$

$$D_v^* \mathbf{grad}_{\mathbf{y}^*} \rho_v^{*(0)} \cdot \mathbf{n}_i = \alpha^* w_k^* \left[ \rho_v^{*(0)} - \rho_{vs}^{*(0)}(T^{*(0)}) \right] \quad \text{on } \Gamma. \quad (\text{B2.14})$$

where the unknown  $\rho_v^{*(0)}(\mathbf{x}^*, \mathbf{y}^*, t)$  is  $\mathbf{y}^*$ -periodic. Consequently, integrating (B2.13) over  $\Omega_a$ , and then using the divergence theorem, the periodicity condition, the boundary conditions (B2.14) leads to:

280

$$\rho_v^{*(0)} = \rho_{vs}^{*(0)} \quad \text{on } \Gamma. \quad (\text{B2.15})$$

Taking into account this result, the solution of the above boundary value problem is given by:

$$T_i^{*(0)} = T_a^{*(0)} = T^{*(0)}(\mathbf{x}^*, t). \quad (\text{B2.16})$$

and

$$\rho_v^{*(0)} = \rho_{vs}^{*(0)}(\mathbf{x}^*, t) = \rho_{vs}^{*(0)}(T^{*(0)}). \quad (\text{B2.17})$$

At the first order, the temperature and the the water vapor density are independent of the microscopic dimensionless variable  $\mathbf{y}^*$ , i.e. we have only one temperature field.

### S.2.2.2 Heat and water vapor transfer at the second order

Taking into account of these results, Eq. (B2.1), (B2.2), (B2.4), and (B2.5) of order  $\varepsilon$  give the following second-order problem:

290

$$\operatorname{div}_{y^*}(k_i^*(\mathbf{grad}_{y^*}T_i^{*(1)} + \mathbf{grad}_{x^*}T^{*(0)})) = 0 \quad \text{in } \Omega_i \quad (\text{B2.18})$$

$$\operatorname{div}_{y^*}(k_a^*(\mathbf{grad}_{y^*}T_a^{*(1)} + \mathbf{grad}_{x^*}T^{*(0)})) = 0 \quad \text{in } \Omega_a \quad (\text{B2.19})$$

$$295 \quad T_i^{*(1)} = T_a^{*(1)} \quad \text{on } \Gamma \quad (\text{B2.20})$$

$$(k_i^*(\mathbf{grad}_{y^*}T_i^{*(1)} + \mathbf{grad}_{x^*}T^{*(0)}) - k_a^*(\mathbf{grad}_{y^*}T_a^{*(1)} + \mathbf{grad}_{x^*}T^{*(0)})) \cdot \mathbf{n}_i = \frac{L^{sg}}{\rho_i^*} D_v^*(\mathbf{grad}_{y^*}\rho_v^{*(1)} + \mathbf{grad}_{x^*}\rho_v^{*(0)}) \cdot \mathbf{n}_i \quad \text{on } \Gamma \quad (\text{B2.21})$$

where the unknowns  $T_i^{*(1)}(\mathbf{x}^*, \mathbf{y}^*, t)$  and  $T_a^{*(1)}(\mathbf{x}^*, \mathbf{y}^*, t)$  are  $\mathbf{y}^*$ -periodic and the macroscopic gradient  $\mathbf{grad}_{x^*}T^{*(0)}$  is given. The second-order problem for the water vapor is given by Eq. (B2.3) and (B2.6) of order  $\varepsilon$ :

$$300 \quad \operatorname{div}_{y^*}(D_v^*(\mathbf{grad}_{y^*}\rho_v^{*(1)} + \mathbf{grad}_{x^*}\rho_v^{*(0)})) = 0 \quad \text{in } \Omega_a \quad (\text{B2.22})$$

$$D_v^*(\mathbf{grad}_{y^*}\rho_v^{*(1)} + \mathbf{grad}_{x^*}\rho_v^{*(0)}) \cdot \mathbf{n}_i = \alpha^* w_k^* [\rho_v^{*(1)} - \rho_{vs}^{*(1)}] \quad \text{on } \Gamma. \quad (\text{B2.23})$$

where the unknowns  $\rho_v^{*(1)}(\mathbf{x}^*, \mathbf{y}^*, t)$  is  $\mathbf{y}^*$ -periodic. Consequently, integrating (B2.22) over  $\Omega_a$ , and then using the divergence theorem, the periodicity condition, the boundary conditions (B2.23) leads to:

$$305 \quad \rho_v^{*(1)} = \rho_{vs}^{*(1)} \quad \text{on } \Gamma. \quad (\text{B2.24})$$

This result also implies that

$$D_v^*(\mathbf{grad}_{y^*}\rho_v^{*(1)} + \mathbf{grad}_{x^*}\rho_v^{*(0)}) \cdot \mathbf{n}_i = 0 \quad \text{on } \Gamma. \quad (\text{B2.25})$$

The above boundary value problem can not be solved by considering both boundary conditions (B2.24) and (B2.25) on the ice-air interface simultaneously. However, it seems reasonable to assume that in the range  $\varepsilon^{1/2} \leq [W_R] \leq 1$  the Neumann boundary condition (B2.25) can be privileged (Case B2), whereas in the range  $1 \leq [W_R] \leq \varepsilon^{-1/2}$  the Dirichlet boundary condition (B2.24) can be considered (Case C1). These two cases will give us the two extreme behaviours when  $[W_R] = \mathcal{O}(1)$ .

310

By considering first the Neumann boundary condition (B2.25), the solution of the above boundary value problem for the temperature appears as a linear function of the macroscopic gradient, modulo an arbitrary function  $\tilde{T}^{*(1)}(\mathbf{x}^*, t)$ :

$$T_i^{*(1)}(\mathbf{x}^*, \mathbf{y}^*, t) = \mathbf{t}_i^*(\mathbf{y}^*) \cdot \mathbf{grad}_{\mathbf{x}^*} T^{*(0)} + \tilde{T}_i^{*(1)} \quad (\text{B2.26})$$

315

$$T_a^{*(1)}(\mathbf{x}^*, \mathbf{y}^*, t) = \mathbf{t}_a^*(\mathbf{y}^*) \cdot \mathbf{grad}_{\mathbf{x}^*} T^{*(0)} + \tilde{T}_a^{*(1)} \quad (\text{B2.27})$$

where  $\mathbf{t}_i^*(\mathbf{y}^*)$  and  $\mathbf{t}_a^*(\mathbf{y}^*)$  are two periodic vectors which characterize the fluctuation of temperature in both phases at the pore scale. Introducing (B2.26) and (B2.27) in the set (B2.18)-(B2.21), these two vectors are solution of the following boundary value problem in a compact form:

$$320 \quad \text{div}_{\mathbf{y}^*} (k_i^* (\mathbf{grad}_{\mathbf{y}^*} \mathbf{t}_i^* + \mathbf{I})) = 0 \quad \text{in } \Omega_i \quad (\text{B2.28})$$

$$\text{div}_{\mathbf{y}^*} (k_a^* (\mathbf{grad}_{\mathbf{y}^*} \mathbf{t}_a^* + \mathbf{I})) = 0 \quad \text{in } \Omega_a \quad (\text{B2.29})$$

$$\mathbf{t}_i^* = \mathbf{t}_a^* \quad \text{on } \Gamma \quad (\text{B2.30})$$

325

$$(k_i^* (\mathbf{grad}_{\mathbf{y}^*} \mathbf{t}_i^* + \mathbf{I}) - k_a^* (\mathbf{grad}_{\mathbf{y}^*} \mathbf{t}_a^* + \mathbf{I})) \cdot \mathbf{n}_i = 0 \quad \text{on } \Gamma \quad (\text{B2.31})$$

$$\frac{1}{|\Omega|} \int_{\Omega} (\mathbf{t}_a^* + \mathbf{t}_i^*) d\Omega = \mathbf{0} \quad (\text{B2.32})$$

This latter equation is introduced to ensure the uniqueness of the solution. Similarly, solution of the boundary value problem (B2.22) and (B2.25) appears as a linear function of the macroscopic gradient  $\mathbf{grad}_{\mathbf{x}^*} \rho_{vs}^{*(0)}(T^{*(0)})$  modulo an arbitrary function  $\tilde{\rho}_v^{*(1)}(\mathbf{x}^*, t)$ :

$$\rho_v^{*(1)}(\mathbf{x}^*, \mathbf{y}^*, t) = \mathbf{g}_v^*(\mathbf{y}^*) \cdot \mathbf{grad}_{\mathbf{x}^*} \rho_{vs}^{*(0)}(T^{*(0)}) + \tilde{\rho}_v^{*(1)}(\mathbf{x}^*, t) \quad (\text{B2.33})$$

where  $\mathbf{g}_v^*(\mathbf{y}^*)$  is a periodic vector which characterizes the fluctuation of water vapor density in the air phase at the pore scale induced by the macroscopic gradient  $\mathbf{grad}_{\mathbf{x}^*} \rho_{vs}^{*(0)}(T^{*(0)})$ . Introducing (B2.33) in the set (B2.22)-(B2.25), this vector is solution of the following boundary value problem in a compact form:

$$335 \quad \text{div}_{\mathbf{y}^*} (D_v^* (\mathbf{grad}_{\mathbf{y}^*} \mathbf{g}_v^* + \mathbf{I})) = 0 \quad \text{in } \Omega_a \quad (\text{B2.34})$$

$$D_v^*(\mathbf{grad}_{y^*} \mathbf{g}_v^* + \mathbf{I}) \cdot \mathbf{n}_i = 0 \quad \text{on } \Gamma \quad (\text{B2.35})$$

$$340 \quad \frac{1}{|\Omega|} \int_{\Omega_a} \mathbf{g}_v^* d\Omega = \mathbf{0} \quad (\text{B2.36})$$

This latter equation is introduced to ensure the uniqueness of the solution.

### S.2.2.3 Macroscopic description

Finally, the third order problem for the heat transfer is given by Eq. (B2.1), (B2.2), (B2.4), and (B2.5) of order  $\varepsilon^2$ :

$$\rho_i^* C_i^* \frac{\partial T^{*(0)}}{\partial t^*} - \text{div}_{y^*} (k_i^* (\mathbf{grad}_{y^*} T_i^{*(2)} + \mathbf{grad}_{x^*} T_i^{*(1)})) - \text{div}_{x^*} (k_i^* (\mathbf{grad}_{y^*} T_i^{*(1)} + \mathbf{grad}_{x^*} T^{*(0)})) = 0 \quad \text{in } \Omega_i \quad (\text{B2.37})$$

345

$$\rho_a^* C_a^* \frac{\partial T^{*(0)}}{\partial t^*} - \text{div}_{y^*} (k_a^* (\mathbf{grad}_{y^*} T_a^{*(2)} + \mathbf{grad}_{x^*} T_a^{*(1)})) - \text{div}_{x^*} (k_a^* (\mathbf{grad}_{y^*} T_a^{*(1)} + \mathbf{grad}_{x^*} T^{*(0)})) = 0 \quad \text{in } \Omega_a \quad (\text{B2.38})$$

$$T_i^{*(2)} = T_a^{*(2)} \quad \text{on } \Gamma \quad (\text{B2.39})$$

$$350 \quad (k_i^* (\mathbf{grad}_{y^*} T_i^{*(2)} + \mathbf{grad}_{x^*} T_i^{*(1)}) - k_a^* (\mathbf{grad}_{y^*} T_a^{*(2)} + \mathbf{grad}_{x^*} T_a^{*(1)})) \cdot \mathbf{n}_i \quad (\text{B2.40})$$

$$= L_{sg}^* \frac{D_v^*}{\rho_i^*} (\mathbf{grad}_{y^*} \rho_v^{*(2)} + \mathbf{grad}_{x^*} \rho_v^{*(1)}) \cdot \mathbf{n}_i \quad \text{on } \Gamma$$

where the unknowns  $T_i^{*(2)}(\mathbf{x}^*, \mathbf{y}^*, t)$  and  $T_a^{*(2)}(\mathbf{x}^*, \mathbf{y}^*, t)$  are  $\mathbf{y}^*$ -periodic. Integrating (B2.37) over  $\Omega_i$  and (B2.38) over  $\Omega_a$ , and then using the divergence theorem, the periodicity condition, and the boundary conditions (B2.40) and the results leads to

355 the first order dimensionless description:

$$(\rho C)^{\text{eff}*} \frac{\partial T^{*(0)}}{\partial t^*} - \text{div}_{x^*} (\mathbf{k}^{\text{eff}*} \mathbf{grad}_{x^*} T^{*(0)}) = - \int_{\Gamma} L_{sg}^* w_n^{*(2)} dS = L_{sg}^* \dot{\phi} \quad (\text{B2.41})$$

where  $(\rho C)^{\text{eff}*}$  and  $\mathbf{k}^{\text{eff}*}$  are the dimensionless effective thermal capacity and the effective dimensionless thermal conductivity respectively, defined as:

$$(\rho C)^{\text{eff}*} = (1 - \phi) \rho_i^* C_i^* + \phi \rho_a^* C_a^* \quad (\text{B2.42})$$

360

$$\mathbf{k}^{\text{eff}*} = \frac{1}{|\Omega|} \left( \int_{\Omega_a} k_a^* (\mathbf{grad}_{y^*} \mathbf{t}_a^*(\mathbf{y}^*) + \mathbf{I}) d\Omega + \int_{\Omega_i} k_i^* (\mathbf{grad}_{y^*} \mathbf{t}_i^*(\mathbf{y}^*) + \mathbf{I}) d\Omega \right) \quad (\text{B2.43})$$

where  $\phi$  is the porosity.

Finally, the third order problem for the water vapor is given by Eq. (B2.3) and (B2.6) of order  $\varepsilon^2$ :

$$\frac{\partial \rho_{vs}^{*(0)}}{\partial t^*} - \operatorname{div}_{y^*} (D_v^* (\mathbf{grad}_{y^*} \rho_v^{*(2)} + \mathbf{grad}_{x^*} \rho_v^{*(1)})) - \operatorname{div}_{x^*} (D_v^* (\mathbf{grad}_{y^*} \rho_v^{*(1)} + \mathbf{grad}_{x^*} \rho_{vs}^{*(0)} (T^{*(0)}))) = 0 \quad \text{in } \Omega_i \quad (\text{B2.44})$$

365

$$D_v^* (\mathbf{grad}_{y^*} \rho_v^{*(2)} + \mathbf{grad}_{x^*} \rho_v^{*(1)}) \cdot \mathbf{n}_i = \rho_i^* w_n^{*(2)} \quad \text{on } \Gamma \quad (\text{B2.45})$$

where the unknown  $\rho_v^{*(2)}(\mathbf{x}^*, \mathbf{y}^*, t)$  is  $\mathbf{y}^*$ -periodic and  $w_n^{*(2)}$  is the normal interface velocity due to the sublimation/deposition process at the first order. Consequently, integrating (B2.44) over  $\Omega_a$ , and then using the divergence theorem, the periodicity condition, and the boundary conditions (B2.45) leads to the first order dimensionless description:

$$370 \quad \phi \frac{\partial \rho_{vs}^{*(0)}}{\partial t} - \operatorname{div}_{x^*} (\mathbf{D}^{\text{eff}*} \mathbf{grad}_{x^*} \rho_{vs}^{*(0)} (T^{*(0)})) = \int_{\Gamma} \rho_i^* w_n^{*(2)} dS = \rho_i^* \dot{\phi} \quad (\text{B2.46})$$

where  $\mathbf{D}^{\text{eff}*}$  is the classical dimensionless effective diffusion tensor defined as:

$$\mathbf{D}^{\text{eff}*} = \frac{1}{|\Omega|} \int_{\Omega_a} D_v^* (\mathbf{grad}_{y^*} \mathbf{g}_v^*(\mathbf{y}^*) + \mathbf{I}) d\Omega \quad (\text{B2.47})$$

### S.3 Cases C1, C2 et C3

#### S.3.1 Case C1

##### 375 S.3.1.1 Heat and water vapor transfer at the second order

The Dirichlet boundary condition (B2.24) is now considered. According to (A.40), this boundary condition can be also written as:

$$\rho_v^{*(1)} = \rho_{vs}^{*(1)} = \gamma^* (T^{*(0)}) T_a^{*(1)} \quad \text{on } \Gamma \quad (\text{C1.1})$$

Moreover, we have

$$380 \quad \mathbf{grad}_{x^*} \rho_{vs}^{*(0)} = \gamma^* (T^{*(0)}) \mathbf{grad}_{x^*} T^{*(0)} \quad (\text{C1.2})$$

thus Eq. (B2.22) and (B2.24) are written:

$$\operatorname{div}_{y^*} (D_v^* (\mathbf{grad}_{y^*} \rho_v^{*(1)} + \gamma^* (T^{*(0)}) \mathbf{grad}_{x^*} T^{*(0)}) = 0 \quad \text{in } \Omega_a \quad (\text{C1.3})$$

$$\rho_v^{*(1)} = \gamma^* (T^{*(0)}) T_a^{*(1)} \quad \text{on } \Gamma \quad (\text{C1.4})$$



385 The solution of the boundary value problems (B2.18)-(B2.21) and (C1.3)-(C1.4) appears as a linear function of the macroscopic gradient  $\mathbf{grad}_{x^*} T^{*(0)}$ , modulo an arbitrary function.

$$T_i^{*(1)}(\mathbf{x}^*, \mathbf{y}^*, t) = \mathbf{r}_i^*(\mathbf{y}^*) \cdot \mathbf{grad}_{x^*} T^{*(0)} + \tilde{T}_i^{*(1)} \quad (\text{C1.5})$$

$$T_a^{*(1)}(\mathbf{x}^*, \mathbf{y}^*, t) = \mathbf{r}_a^*(\mathbf{y}^*) \cdot \mathbf{grad}_{x^*} T^{*(0)} + \tilde{T}_a^{*(1)} \quad (\text{C1.6})$$

390

$$\rho_v^{*(1)}(\mathbf{x}^*, \mathbf{y}^*, t) = \gamma^*(T^{*(0)}) (\mathbf{r}_a^*(\mathbf{y}^*) \cdot \mathbf{grad}_{x^*} T^{*(0)} + \tilde{T}_a^{*(1)}) \quad \text{on } \Gamma \quad (\text{C1.7})$$

where  $\mathbf{r}_i^*(\mathbf{y}^*)$  and  $\mathbf{r}_a^*(\mathbf{y}^*)$  are two periodic vectors which characterize the fluctuation of temperature in both phases at the pore scale. Introducing (C1.5) and (C1.6) in the set (B2.18)-(B2.21) and (C1.3)-(C1.4), these two vectors are solution of the following boundary value problem in a compact form:

$$395 \quad \text{div}_{y^*} (k_i^* (\mathbf{grad}_{y^*} \mathbf{r}_i^* + \mathbf{I})) = 0 \quad \text{in } \Omega_i \quad (\text{C1.8})$$

$$\text{div}_{y^*} \left( (k_a^* + L_{sg}^* D_v^* \frac{\gamma^*(T^{*(0)})}{\rho_i^*}) (\mathbf{grad}_{y^*} \mathbf{r}_a^* + \mathbf{I}) \right) = 0 \quad \text{in } \Omega_a \quad (\text{C1.9})$$

$$\mathbf{r}_i^* = \mathbf{r}_a^* \quad \text{on } \Gamma \quad (\text{C1.10})$$

400

$$(k_i^* (\mathbf{grad}_{y^*} \mathbf{r}_i^* + \mathbf{I}) - (k_a^* + L_{sg}^* D_v^* \frac{\gamma^*(T^{*(0)})}{\rho_i^*}) (\mathbf{grad}_{y^*} \mathbf{r}_a^* + \mathbf{I})) \cdot \mathbf{n}_i = 0 \quad \text{on } \Gamma \quad (\text{C1.11})$$

$$\frac{1}{|\Omega|} \int_{\Omega} (\mathbf{r}_a^* + \mathbf{r}_i^*) d\Omega = \mathbf{0} \quad (\text{C1.12})$$

This latter equation is introduced to ensure the uniqueness of the solution. This latter boundary value problem is similar as the  
 405 (A.20)-(A.24) where  $k_a^*$  is now equal to  $k_a^* + L_{sg}^* D_v^* \gamma^*(T^{*(0)}) / \rho_i^*$ . At the local scale, the thermal conductivity appears to be enhanced by the phase change.

### S.3.1.2 Macroscopic description

Finally, the third order problem is given by Eq. (B2.1), (B2.2), (B2.4), and (B2.5) of order  $\varepsilon^2$ :

$$\rho_i^* C_i^* \frac{\partial T^{*(0)}}{\partial t^*} - \text{div}_{y^*} (k_i^* (\mathbf{grad}_{y^*} T_i^{*(2)} + \mathbf{grad}_{x^*} T_i^{*(1)})) - \text{div}_{x^*} (k_i^* (\mathbf{grad}_{y^*} T_i^{*(1)} + \mathbf{grad}_{x^*} T^{*(0)})) = 0 \quad \text{in } \Omega_i \quad (\text{C1.13})$$

$$\rho_a^* C_a^* \frac{\partial T^{*(0)}}{\partial t^*} - \text{div}_{y^*} (k_a^* (\mathbf{grad}_{y^*} T_a^{*(2)} + \mathbf{grad}_{x^*} T_a^{*(1)})) - \text{div}_{x^*} (k_a^* (\mathbf{grad}_{y^*} T_a^{*(1)} + \mathbf{grad}_{x^*} T^{*(0)})) = 0 \quad \text{in } \Omega_a \quad (\text{C1.14})$$

$$T_i^{*(2)} = T_a^{*(2)} \quad \text{on } \Gamma \quad (\text{C1.15})$$

$$\begin{aligned} 415 \quad & (k_i^* (\mathbf{grad}_{y^*} T_i^{*(2)} + \mathbf{grad}_{x^*} T_i^{*(1)}) - k_a^* (\mathbf{grad}_{y^*} T_a^{*(2)} + \mathbf{grad}_{x^*} T_a^{*(1)})) \cdot \mathbf{n}_i = \\ & = L_{sg}^* \frac{D_v^*}{\rho_i^*} (\mathbf{grad}_{y^*} \rho_v^{*(2)} + \mathbf{grad}_{x^*} \rho_v^{*(1)}) \cdot \mathbf{n}_i \quad \text{on } \Gamma. \end{aligned} \quad (\text{C1.16})$$

where the unknowns  $T_i^{*(2)}(\mathbf{x}^*, \mathbf{y}^*, t)$  and  $T_a^{*(2)}(\mathbf{x}^*, \mathbf{y}^*, t)$  are  $\mathbf{y}^*$ -periodic. For the water vapor, the third order problem is given by Eq. (B2.3) and (B2.6) of order  $\varepsilon^2$ :

$$420 \quad \frac{\partial \rho_{vs}^{*(0)}}{\partial t^*} - \text{div}_{y^*} (D_v^* (\mathbf{grad}_{y^*} \rho_v^{*(2)} + \mathbf{grad}_{x^*} \rho_v^{*(1)})) - \text{div}_{x^*} (D_v^* (\mathbf{grad}_{y^*} \rho_v^{*(1)} + \mathbf{grad}_{x^*} \rho_{vs}^{*(0)}(T^{*(0)}))) = 0 \quad \text{in } \Omega_a \quad (\text{C1.17})$$

$$D_v^* (\mathbf{grad}_{y^*} \rho_v^{*(2)} + \mathbf{grad}_{x^*} \rho_v^{*(1)}) \cdot \mathbf{n}_i = \rho_i^* w_n^{*(2)} \quad \text{on } \Gamma \quad (\text{C1.18})$$

Integrating (C1.13) over  $\Omega_i$  and (C1.14) over  $\Omega_a$ , and then using the divergence theorem, the periodicity condition, and the boundary conditions (C1.16) leads to the first order dimensionless description:

$$425 \quad (\rho C)^{\text{eff}*} \frac{\partial T^{*(0)}}{\partial t^*} - \text{div}_{x^*} (\mathbf{k}^{\text{td}*} \mathbf{grad}_{x^*} T^{*(0)}) = \int_{\Gamma} L_{sg}^* \frac{D_v^*}{\rho_i^*} (\mathbf{grad}_{y^*} \rho_v^{*(2)} + \mathbf{grad}_{x^*} \rho_v^{*(1)}) \cdot \mathbf{n}_i dS = -L_{sg}^* \dot{\phi}. \quad (\text{C1.19})$$

where  $(\rho C)^{\text{eff}*}$  and  $\mathbf{k}^{\text{td}*}$  are the dimensionless effective thermal capacity and the apparent dimensionless thermal conductivity, respectively, defined as:

$$(\rho C)^{\text{eff}*} = (1 - \phi) \rho_i^* C_i^* + \phi \rho_a^* C_a^* \quad (\text{C1.20})$$

$$430 \quad \mathbf{k}^{\text{td}*} = \frac{1}{|\Omega|} \left( \int_{\Omega_a} k_a^* (\mathbf{grad}_{y^*} \mathbf{r}_a^*(\mathbf{y}^*) + \mathbf{I}) d\Omega + \int_{\Omega_i} k_i^* (\mathbf{grad}_{y^*} \mathbf{r}_i^*(\mathbf{y}^*) + \mathbf{I}) d\Omega \right) \quad (\text{C1.21})$$

where  $\phi$  is the porosity. Integrating (C1.17) over  $\Omega_a$ , and then using the divergence theorem and the periodicity condition, leads to the first order dimensionless description:

$$\phi \frac{\partial \rho_{vs}^{*(0)}}{\partial t} - \text{div}_{x^*} (\mathbf{D}^{\text{td}*} \mathbf{grad}_{x^*} \rho_{vs}^{*(0)}(T^{*(0)})) = - \int_{\Gamma} D_v^* (\mathbf{grad}_{y^*} \rho_v^{*(2)} + \mathbf{grad}_{x^*} \rho_v^{*(1)}) \cdot \mathbf{n}_i dS = \rho_i^* \dot{\phi}. \quad (\text{C1.22})$$

where  $\mathbf{D}^{\text{td}*}$  is the macroscopic effective diffusion tensor defined as:

$$435 \quad \mathbf{D}^{\text{td}*} = \frac{1}{|\Omega|} \int_{\Omega_a} D_v^* (\mathbf{grad}_{y^*} \mathbf{r}_a^*(\mathbf{y}^*) + \mathbf{I}) d\Omega \quad (\text{C1.23})$$

### S.3.2 Case C2

Taking into account of the order of magnitude of the dimensionless numbers,  $[F_i^T] = \mathcal{O}([F_a^T]) = \mathcal{O}([F_a^\rho]) = \mathcal{O}(\varepsilon^2)$ ,  $[K] = \mathcal{O}(1)$ ,  $[W_R] = \mathcal{O}(\varepsilon^{-1})$ ,  $[H] = \mathcal{O}(1)$ , the dimensionless microscopic description (13)-(18) becomes:

$$\varepsilon^2 \rho_i^* C_i^* \frac{\partial T_i^*}{\partial t^*} - \text{div}^*(k_i^* \mathbf{grad}^* T_i^*) = 0 \quad \text{in } \Omega_i \quad (\text{C2.1})$$

440

$$\varepsilon^2 \rho_a^* C_a^* \frac{\partial T_a^*}{\partial t^*} - \text{div}^*(k_a^* \mathbf{grad}^* T_a^*) = 0 \quad \text{in } \Omega_a \quad (\text{C2.2})$$

$$\varepsilon^2 \frac{\partial \rho_v^*}{\partial t^*} - \text{div}^*(D_v^* \mathbf{grad}^* \rho_v^*) = 0 \quad \text{in } \Omega_a \quad (\text{C2.3})$$

$$445 \quad T_i^* = T_a^* \quad \text{on } \Gamma \quad (\text{C2.4})$$

$$k_i^* \mathbf{grad}^* T_i^* \cdot \mathbf{n}_i - k_a^* \mathbf{grad}^* T_a^* \cdot \mathbf{n}_i = L_{sg}^* \frac{D_v^*}{\rho_i^*} \mathbf{grad}^* \rho_v^* \cdot \mathbf{n}_i \quad \text{on } \Gamma \quad (\text{C2.5})$$

$$D_v^* \mathbf{grad}^* \rho_v^* \cdot \mathbf{n}_i = \varepsilon^{-1} \rho_i^* \mathbf{w}^* \cdot \mathbf{n}_i \quad \text{on } \Gamma. \quad (\text{C2.6})$$

450 This set of equations is completed by the Hertz-Knudsen equation (A.7) and the Clausius Clapeyron's law (9) expressed in dimensionless form as:

$$w_n^* = \mathbf{w}^* \cdot \mathbf{n}_i = \frac{\alpha^*}{\rho_i^*} w_k^* [\rho_v^* - \rho_{vs}^*(T_a^*)] \quad \text{on } \Gamma \quad (\text{C2.7})$$

$$\rho_{vs}^*(T_a^*) = \rho_{vs}^{\text{ref}*}(T^{\text{ref}*}) \exp \left[ \frac{L_{sg}^* m^*}{\rho_i^* k^*} \left( \frac{1}{T^{\text{ref}*}} - \frac{1}{T_a^*} \right) \right] \quad (\text{C2.8})$$

#### 455 S.3.2.1 Heat transfer and water vapor transfer at the first and the second order

Introducing asymptotic expansions for  $T_i^*$  and  $T_a^*$  in the relations (C2.1), (C2.2), (C2.4), and (C2.5) give at the lowest order:

$$\text{div}_{y^*}(k_i^* \mathbf{grad}_{y^*} T_i^{*(0)}) = 0 \quad \text{in } \Omega_i \quad (\text{C2.9})$$

$$\text{div}_{y^*}(k_a^* \mathbf{grad}_{y^*} T_a^{*(0)}) = 0 \quad \text{in } \Omega_a \quad (\text{C2.10})$$

$$T_i^{*(0)} = T_a^{*(0)} \quad \text{on } \Gamma \quad (\text{C2.11})$$

$$(k_i^* \mathbf{grad}_{y^*} T_i^{*(0)} - k_a^* \mathbf{grad}_{y^*} T_a^{*(0)}) \cdot \mathbf{n}_i = L_{sg}^* \frac{D_v^*}{\rho_i^*} \mathbf{grad}_{y^*} \rho_v^{*(0)} \quad \text{on } \Gamma \quad (\text{C2.12})$$

where the unknowns  $T_i^{*(0)}(\mathbf{x}^*, \mathbf{y}^*, t)$  and  $T_a^{*(0)}(\mathbf{x}^*, \mathbf{y}^*, t)$  are  $\mathbf{y}^*$ -periodic. Introducing asymptotic expansions for  $\rho_v^*$  in the relations (C2.3, C2.6) give at the lowest order:

$$\text{div}_{y^*} (D_v^* \mathbf{grad}_{y^*} \rho_v^{*(0)}) = 0 \quad \text{in } \Omega_a \quad (\text{C2.13})$$

$$\rho_v^{*(0)} = \rho_{vs}^{*(0)}(T^{*(0)}) \quad \text{on } \Gamma. \quad (\text{C2.14})$$

where the unknown  $\rho_v^{*(0)}(\mathbf{x}^*, \mathbf{y}^*, t)$  is  $\mathbf{y}^*$ -periodic. The solution of the above boundary value problems is given by:

$$\rho_v^{*(0)} = \rho_{vs}^{*(0)}(\mathbf{x}^*, t) = \rho_{vs}^{*(0)}(T^{*(0)}). \quad (\text{C2.15})$$

$$T_i^{*(0)} = T_a^{*(0)} = T^{*(0)}(\mathbf{x}^*, t). \quad (\text{C2.16})$$

At the first order, the temperature and the water vapor density are independent of the microscopic dimensionless variable  $\mathbf{y}^*$ . We have only one temperature field. Taking into account of these results, Eq. (C2.1), (C2.2), (C2.4), and (C2.5) of order  $\varepsilon$  give the following second-order problem:

$$\text{div}_{y^*} (k_i^* (\mathbf{grad}_{y^*} T_i^{*(1)} + \mathbf{grad}_{x^*} T^{*(0)})) = 0 \quad \text{in } \Omega_i \quad (\text{C2.17})$$

$$\text{div}_{y^*} (k_a^* (\mathbf{grad}_{y^*} T_a^{*(1)} + \mathbf{grad}_{x^*} T^{*(0)})) = 0 \quad \text{in } \Omega_a \quad (\text{C2.18})$$

$$T_i^{*(1)} = T_a^{*(1)} \quad \text{on } \Gamma \quad (\text{C2.19})$$

$$(k_i^* (\mathbf{grad}_{y^*} T_i^{*(1)} + \mathbf{grad}_{x^*} T^{*(0)}) - k_a^* (\mathbf{grad}_{y^*} T_a^{*(1)} + \mathbf{grad}_{x^*} T^{*(0)})) \cdot \mathbf{n}_i \quad (\text{C2.20})$$

$$= L_{sg}^* \frac{D_v^*}{\rho_i^*} (\mathbf{grad}_{y^*} \rho_v^{*(1)} + \mathbf{grad}_{x^*} \rho_v^{*(0)}) \cdot \mathbf{n}_i \quad \text{on } \Gamma.$$

485 where the unknowns  $T_i^{*(1)}(\mathbf{x}^*, \mathbf{y}^*, t)$  and  $T_a^{*(1)}(\mathbf{x}^*, \mathbf{y}^*, t)$  are  $\mathbf{y}^*$ -periodic and the macroscopic gradient  $\mathbf{grad}_{x^*} T^{*(0)}$  is given. Moreover we have the second-order problem for Eq. (C2.3) and (C2.6) is written:

$$\text{div}_{y^*} (D_v^* (\mathbf{grad}_{y^*} \rho_v^{*(1)} + \mathbf{grad}_{x^*} \rho_{vs}^{*(0)})) = 0 \quad \text{in } \Omega_a \quad (\text{C2.21})$$

$$\rho_v^{*(1)} = \rho_{vs}^{*(1)} \quad \text{on } \Gamma. \quad (\text{C2.22})$$

490 where the unknowns  $\rho_v^{*(1)}(\mathbf{x}^*, \mathbf{y}^*, t)$  is  $\mathbf{y}^*$ -periodic. According to (A.40), this latter boundary condition can be also written

$$\rho_v^{*(1)} = \rho_{vs}^{*(1)} = \gamma^*(T^{*(0)}) T_a^{*(1)} \quad \text{on } \Gamma \quad (\text{C2.23})$$

Moreover, we have

$$\mathbf{grad}_{x^*} \rho_{vs}^{*(0)} = \gamma^*(T^{*(0)}) \mathbf{grad}_{x^*} T^{*(0)} \quad (\text{C2.24})$$

thus Eq. (C2.21) and (C2.23) are written:

$$495 \quad \text{div}_{y^*} (D_v^* (\mathbf{grad}_{y^*} \rho_v^{*(1)} + \gamma^*(T^{*(0)}) \mathbf{grad}_{x^*} T^{*(0)}) = 0 \quad \text{in } \Omega_a \quad (\text{C2.25})$$

$$\rho_v^{*(1)} = \gamma^*(T^{*(0)}) T_a^{*(1)} \quad \text{on } \Gamma \quad (\text{C2.26})$$

As in the Case C1, the solution of the above boundary value problems (C2.17)-(C2.20) and (C2.25)-(C2.26) appears as a linear function of the macroscopic gradient  $\mathbf{grad}_{x^*} T^{*(0)}$ , modulo an arbitrary function.

$$500 \quad T_i^{*(1)}(\mathbf{x}^*, \mathbf{y}^*, t) = \mathbf{r}_i^*(\mathbf{y}^*) \cdot \mathbf{grad}_{x^*} T^{*(0)} + \tilde{T}_i^{*(1)} \quad (\text{C2.27})$$

$$T_a^{*(1)}(\mathbf{x}^*, \mathbf{y}^*, t) = \mathbf{r}_a^*(\mathbf{y}^*) \cdot \mathbf{grad}_{x^*} T^{*(0)} + \tilde{T}_a^{*(1)} \quad (\text{C2.28})$$

$$\rho_v^{*(1)}(\mathbf{x}^*, \mathbf{y}^*, t) = \gamma^*(T^{*(0)}) (\mathbf{r}_a^*(\mathbf{y}^*) \cdot \mathbf{grad}_{x^*} T^{*(0)} + \tilde{T}_a^{*(1)}) \quad \text{on } \Gamma \quad (\text{C2.29})$$

505 where  $\mathbf{r}_i^*(\mathbf{y}^*)$  and  $\mathbf{r}_a^*(\mathbf{y}^*)$  are two periodic vectors which characterize the fluctuation of temperature in both phases at the pore scale. Introducing (C2.27) and (C2.28) in the set (C2.17)-(C2.20), these two vectors are solution of the following boundary value problem in a compact form:

$$\text{div}_{y^*} (k_i^* (\mathbf{grad}_{y^*} \mathbf{r}_i^* + \mathbf{I})) = 0 \quad \text{in } \Omega_i \quad (\text{C2.30})$$

$$510 \quad \operatorname{div}_{y^*}(k_a^*(\mathbf{grad}_{y^*}\mathbf{r}_a^* + \mathbf{I})) = 0 \quad \text{in } \Omega_a \quad (\text{C2.31})$$

$$\mathbf{r}_i^* = \mathbf{r}_a^* \quad \text{on } \Gamma \quad (\text{C2.32})$$

$$(k_i^*(\mathbf{grad}_{y^*}\mathbf{r}_i^* + \mathbf{I}) - (k_a^* + L_{sg}D_v^* \frac{\gamma^*(T^{*(0)})}{\rho_i^*})(\mathbf{grad}_{y^*}\mathbf{r}_a^* + \mathbf{I})) \cdot \mathbf{n}_i = 0 \quad \text{on } \Gamma \quad (\text{C2.33})$$

515

$$\frac{1}{|\Omega|} \int_{\Omega} (\mathbf{r}_a^* + \mathbf{r}_i^*) d\Omega = \mathbf{0} \quad (\text{C2.34})$$

This latter equation is introduced to ensure the uniqueness of the solution. This latter boundary value problem is similar as the (A.20)-(A.24) where  $k_a^*$  is now equal to  $k_a^* + L_{sg}D_v^* \gamma^*(T^{*(0)})/\rho_i^*$ . At the local scale, the thermal conductivity appears to be enhanced by the phase change.

### 520 S.3.2.2 Macroscopic description

Finally, the third order problem is given by the equations (C2.1, C2.2, C2.4, C2.5) of order  $\varepsilon^2$ :

$$\rho_i^* C_i^* \frac{\partial T^{*(0)}}{\partial t^*} - \operatorname{div}_{y^*}(k_i^*(\mathbf{grad}_{y^*}T_i^{*(2)} + \mathbf{grad}_{x^*}T_i^{*(1)})) - \operatorname{div}_{x^*}(k_i^*(\mathbf{grad}_{y^*}T_i^{*(1)} + \mathbf{grad}_{x^*}T^{*(0)})) = 0 \quad \text{in } \Omega_i \quad (\text{C2.35})$$

$$\rho_a^* C_a^* \frac{\partial T^{*(0)}}{\partial t^*} - \operatorname{div}_{y^*}(k_a^*(\mathbf{grad}_{y^*}T_a^{*(2)} + \mathbf{grad}_{x^*}T_a^{*(1)})) - \operatorname{div}_{x^*}(k_a^*(\mathbf{grad}_{y^*}T_a^{*(1)} + \mathbf{grad}_{x^*}T^{*(0)})) = 0 \quad \text{in } \Omega_a \quad (\text{C2.36})$$

525

$$T_i^{*(2)} = T_a^{*(2)} \quad \text{on } \Gamma \quad (\text{C2.37})$$

$$(k_i^*(\mathbf{grad}_{y^*}T_i^{*(2)} + \mathbf{grad}_{x^*}T_i^{*(1)}) - k_a^*(\mathbf{grad}_{y^*}T_a^{*(2)} + \mathbf{grad}_{x^*}T_a^{*(1)})) \cdot \mathbf{n}_i = \quad (\text{C2.38})$$

$$530 \quad = L_{sg} \frac{D_v^*}{\rho_i^*} (\mathbf{grad}_{y^*}\rho_v^{*(2)} + \mathbf{grad}_{x^*}\rho_v^{*(1)}) \cdot \mathbf{n}_i \quad \text{on } \Gamma.$$

where the unknowns  $T_i^{*(2)}(\mathbf{x}^*, \mathbf{y}^*, t)$  and  $T_a^{*(2)}(\mathbf{x}^*, \mathbf{y}^*, t)$  are  $\mathbf{y}^*$ -periodic. For the water vapor, the third order problem is given by the the equations (C2.3, C2.6) of order  $\varepsilon^2$ :

$$\frac{\partial \rho_{vs}^{*(0)}}{\partial t^*} - \operatorname{div}_{y^*}(D_v^*(\mathbf{grad}_{y^*}\rho_v^{*(2)} + \mathbf{grad}_{x^*}\rho_v^{*(1)})) - \operatorname{div}_{x^*}(D_v^*(\mathbf{grad}_{y^*}\rho_v^{*(1)} + \mathbf{grad}_{x^*}\rho_{vs}^{*(0)}(T^{*(0)}))) = 0 \quad \text{in } \Omega_a \quad (\text{C2.39})$$

$$535 \quad D_v^*(\mathbf{grad}_{y^*}\rho_v^{*(2)} + \mathbf{grad}_{x^*}\rho_v^{*(1)}) \cdot \mathbf{n}_i = \rho_i^* w_n^{*(3)} \quad \text{on } \Gamma \quad (\text{C2.40})$$

Integrating (C2.35) over  $\Omega_i$  and (C2.36) and (C2.39) over  $\Omega_a$ , and then using the divergence theorem, the periodicity condition, and the boundary conditions (B2.40) leads to the first order dimensionless description:

$$(\rho C)^{\text{eff}*} \frac{\partial T^{*(0)}}{\partial t^*} - \text{div}_{x^*}(\mathbf{k}^{\text{td}*} \mathbf{grad}_{x^*} T^{*(0)}) = \int_{\Gamma} L_{sg}^* \frac{D_v^*}{\rho_i^*} (\mathbf{grad}_{y^*}\rho_v^{*(2)} + \mathbf{grad}_{x^*}\rho_v^{*(1)}) \cdot \mathbf{n}_i dS = -L_{sg}^* \dot{\phi}. \quad (\text{C2.41})$$

where  $(\rho C)^{\text{eff}*}$  and  $\mathbf{k}^{\text{td}*}$  are the dimensionless effective thermal capacity and the apparent dimensionless conductivity respectively, defined as:

$$(\rho C)^{\text{eff}*} = (1 - \phi)\rho_i^* C_i^* + \phi\rho_a^* C_a^* \quad (\text{C2.42})$$

$$\mathbf{k}^{\text{td}*} = \frac{1}{|\Omega|} \left( \int_{\Omega_a} k_a^* (\mathbf{grad}_{y^*} \mathbf{r}_a^*(\mathbf{y}^*) + \mathbf{I}) d\Omega + \int_{\Omega_i} k_i^* (\mathbf{grad}_{y^*} \mathbf{r}_i^*(\mathbf{y}^*) + \mathbf{I}) d\Omega \right) \quad (\text{C2.43})$$

where  $\phi$  is the porosity. Integrating (C2.39) over  $\Omega_a$ , and then using the divergence theorem and the periodicity condition, leads to the first order dimensionless description:

$$\phi \frac{\partial \rho_{vs}^{*(0)}}{\partial t} - \text{div}_{x^*}(\mathbf{D}^{\text{td}*} \mathbf{grad}_{x^*} \rho_{vs}^{*(0)}(T^{*(0)})) = - \int_{\Gamma} D_v^* (\mathbf{grad}_{y^*}\rho_v^{*(2)} + \mathbf{grad}_{x^*}\rho_v^{*(1)}) \cdot \mathbf{n}_i dS = \rho_i^* \dot{\phi}. \quad (\text{C2.44})$$

where  $\mathbf{D}^{\text{td}*}$  is the apparent effective diffusion tensor defined as:

$$\mathbf{D}^{\text{td}*} = \frac{1}{|\Omega|} \int_{\Omega_a} D_v^* (\mathbf{grad}_{y^*} \mathbf{r}_a^*(\mathbf{y}^*) + \mathbf{I}) d\Omega \quad (\text{C2.45})$$

### S.3.3 Case C3

550 Taking into account of the order of magnitude of the dimensionless numbers,  $[F_i^T] = \mathcal{O}([F_a^T]) = \mathcal{O}([F_a^p]) = \mathcal{O}(\varepsilon^2)$ ,  $[K] = \mathcal{O}(1)$ ,  $[W_R] = \mathcal{O}(\varepsilon^{-1})$ ,  $[H] = \mathcal{O}(1)$ , the dimensionless microscopic description (13)-(18) becomes:

$$\varepsilon^2 \rho_i^* C_i^* \frac{\partial T_i^*}{\partial t^*} - \text{div}^*(k_i^* \mathbf{grad}^* T_i^*) = 0 \quad \text{in } \Omega_i \quad (\text{C3.1})$$

$$\varepsilon^2 \rho_a^* C_a^* \frac{\partial T_a^*}{\partial t^*} - \text{div}^*(k_a^* \mathbf{grad}^* T_a^*) = 0 \quad \text{in } \Omega_a \quad (\text{C3.2})$$

555

$$\varepsilon^2 \frac{\partial \rho_v^*}{\partial t^*} - \text{div}^*(D_v^* \mathbf{grad}^* \rho_v^*) = 0 \quad \text{in } \Omega_a \quad (\text{C3.3})$$

$$T_i^* = T_a^* \quad \text{on } \Gamma \quad (\text{C3.4})$$

$$560 \quad k_i^* \mathbf{grad}^* T_i^* \cdot \mathbf{n}_i - k_a^* \mathbf{grad}^* T_a^* \cdot \mathbf{n}_i = L_{sg}^* \frac{D_v^*}{\rho_i^*} \mathbf{grad}^* \rho_v^* \cdot \mathbf{n}_i \quad \text{on } \Gamma \quad (\text{C3.5})$$

$$D_v^* \mathbf{grad}^* \rho_v^* \cdot \mathbf{n}_i = \varepsilon^{-2} \rho_i^* \mathbf{w}^* \cdot \mathbf{n}_i \quad \text{on } \Gamma. \quad (\text{C3.6})$$

This set of equations is completed by the Hertz-Knudsen equation (A.7) and the Clausius Clapeyron's law (9) expressed in dimensionless form as:

$$565 \quad w_n^* = \mathbf{w}^* \cdot \mathbf{n}_i = \frac{\alpha^*}{\rho_i^*} w_k^* [\rho_v^* - \rho_{vs}^*(T_a^*)] \quad \text{on } \Gamma \quad (\text{C3.7})$$

$$\rho_{vs}^*(T_a^*) = \rho_{vs}^{\text{ref}*}(T^{\text{ref}*}) \exp \left[ \frac{L_{sg}^* m^*}{\rho_i^* k^*} \left( \frac{1}{T^{\text{ref}*}} - \frac{1}{T_a^*} \right) \right] \quad (\text{C3.8})$$

### S.3.3.1 Heat transfer and water vapor transfer at the first and second order

Introducing asymptotic expansions for  $T_i^*$  and  $T_a^*$  in the relations (C3.1, C3.2, C3.4, C3.5) give at the lowest order:

$$570 \quad \text{div}_{y^*} (k_i^* \mathbf{grad}_{y^*} T_i^{*(0)}) = 0 \quad \text{in } \Omega_i \quad (\text{C3.9})$$

$$\text{div}_{y^*} (k_a^* \mathbf{grad}_{y^*} T_a^{*(0)}) = 0 \quad \text{in } \Omega_a \quad (\text{C3.10})$$

$$T_i^{*(0)} = T_a^{*(0)} \quad \text{on } \Gamma \quad (\text{C3.11})$$

575

$$(k_i^* \mathbf{grad}_{y^*} T_i^{*(0)} - k_a^* \mathbf{grad}_{y^*} T_a^{*(0)}) \cdot \mathbf{n}_i = L_{sg}^* \frac{D_v^*}{\rho_i^*} \mathbf{grad}_{y^*} \rho_v^{*(0)} \quad \text{on } \Gamma \quad (\text{C3.12})$$

where the unknowns  $T_i^{*(0)}(\mathbf{x}^*, \mathbf{y}^*, t)$  and  $T_a^{*(0)}(\mathbf{x}^*, \mathbf{y}^*, t)$  are  $\mathbf{y}^*$ -periodic. Introducing asymptotic expansions for  $\rho_v^*$  in the relations (C3.3, C3.6) give at the lowest order

$$\text{div}_{y^*} (D_v^* \mathbf{grad}_{y^*} \rho_v^{*(0)}) = 0 \quad \text{in } \Omega_a \quad (\text{C3.13})$$



$$\rho_v^{*(0)} = \rho_{vs}^{*(0)}(T^{*(0)}) \quad \text{on } \Gamma. \quad (\text{C3.14})$$

where the unknowns  $\rho_v^{*(0)}(\mathbf{x}^*, \mathbf{y}^*, t)$  is  $\mathbf{y}^*$ -periodic. The solution of the above boundary value problems is given by:

$$\rho_v^{*(0)} = \rho_v^{*(0)}(\mathbf{x}^*, t) = \rho_{vs}^{*(0)}(T^{*(0)}). \quad (\text{C3.15})$$

$$585 \quad T_i^{*(0)} = T_a^{*(0)} = T^{*(0)}(\mathbf{x}^*, t). \quad (\text{C3.16})$$

At the first order, the temperature and the water vapor density are independent of the microscopic dimensionless variable  $\mathbf{y}^*$ . We have only one temperature field. Taking into account of these results, equations (C3.1, C3.2, C3.4, C3.5) of order  $\varepsilon$  give the following second-order problem:

$$\text{div}_{y^*}(k_i^*(\mathbf{grad}_{y^*} T_i^{*(1)} + \mathbf{grad}_{x^*} T^{*(0)})) = 0 \quad \text{in } \Omega_i \quad (\text{C3.17})$$

590

$$\text{div}_{y^*}(k_a^*(\mathbf{grad}_{y^*} T_a^{*(1)} + \mathbf{grad}_{x^*} T^{*(0)})) = 0 \quad \text{in } \Omega_a \quad (\text{C3.18})$$

$$T_i^{*(1)} = T_a^{*(1)} \quad \text{on } \Gamma \quad (\text{C3.19})$$

$$595 \quad (k_i^*(\mathbf{grad}_{y^*} T_i^{*(1)} + \mathbf{grad}_{x^*} T^{*(0)}) - k_a^*(\mathbf{grad}_{y^*} T_a^{*(1)} + \mathbf{grad}_{x^*} T^{*(0)})) \cdot \mathbf{n}_i \quad (\text{C3.20})$$

$$= L_{sg}^* \frac{D_v^*}{\rho_i^*} (\mathbf{grad}_{y^*} \rho_v^{*(1)} + \mathbf{grad}_{x^*} \rho_v^{*(0)}) \cdot \mathbf{n}_i \quad \text{on } \Gamma.$$

where the unknowns  $T_i^{*(1)}(\mathbf{x}^*, \mathbf{y}^*, t)$  and  $T_a^{*(1)}(\mathbf{x}^*, \mathbf{y}^*, t)$  are  $\mathbf{y}^*$ -periodic and the macroscopic gradient  $\mathbf{grad}_{x^*} T^{*(0)}$  is given.

Moreover we have the second-order problem for the equations (C3.3, C3.6) is written:

$$600 \quad \text{div}_{y^*}(D_v^*(\mathbf{grad}_{y^*} \rho_v^{*(1)} + \mathbf{grad}_{x^*} \rho_{vs}^{*(0)})) = 0 \quad \text{in } \Omega_a \quad (\text{C3.21})$$

$$\rho_v^{*(1)} = \rho_{vs}^{*(1)} \quad \text{on } \Gamma. \quad (\text{C3.22})$$

where the unknowns  $\rho_v^{*(1)}(\mathbf{x}^*, \mathbf{y}^*, t)$  is  $\mathbf{y}^*$ -periodic. According to (A.40), this latter boundary condition can be also written

$$\rho_v^{*(1)} = \rho_{vs}^{*(1)} = \gamma^*(T^{*(0)}) T_a^{*(1)} \quad \text{on } \Gamma \quad (\text{C3.23})$$

605 Moreover, we have

$$\mathbf{grad}_{x^*} \rho_{vs}^{*(0)} = \gamma^*(T^{*(0)}) \mathbf{grad}_{x^*} T^{*(0)} \quad (\text{C3.24})$$

thus equations (C3.21) and (C3.23) are written:

$$\text{div}_{y^*} (D_v^* (\mathbf{grad}_{y^*} \rho_v^{*(1)} + \gamma^*(T^{*(0)}) \mathbf{grad}_{x^*} T^{*(0)}) = 0 \quad \text{in } \Omega_a \quad (\text{C3.25})$$

$$610 \quad \rho_v^{*(1)} = \gamma^*(T^{*(0)}) T_a^{*(1)} \quad \text{on } \Gamma \quad (\text{C3.26})$$

As in the Cases C1 and C2, the solution of the above boundary value problems (C3.17-C3.20) and (C3.25-C3.26) appears as a linear function of the macroscopic gradient  $\mathbf{grad}_{x^*} T^{*(0)}$ , modulo an arbitrary function.

$$T_i^{*(1)}(\mathbf{x}^*, \mathbf{y}^*, t) = \mathbf{r}_i^*(\mathbf{y}^*) \cdot \mathbf{grad}_{x^*} T^{*(0)} + \tilde{T}_i^{*(1)} \quad (\text{C3.27})$$

$$615 \quad T_a^{*(1)}(\mathbf{x}^*, \mathbf{y}^*, t) = \mathbf{r}_a^*(\mathbf{y}^*) \cdot \mathbf{grad}_{x^*} T^{*(0)} + \tilde{T}_a^{*(1)} \quad (\text{C3.28})$$

$$\rho_v^{*(1)}(\mathbf{x}^*, \mathbf{y}^*, t) = \gamma^*(T^{*(0)}) (\mathbf{r}_a^*(\mathbf{y}^*) \cdot \mathbf{grad}_{x^*} T^{*(0)} + \tilde{T}_a^{*(1)}) \quad \text{on } \Gamma \quad (\text{C3.29})$$

where  $\mathbf{r}_i^*(\mathbf{y}^*)$  and  $\mathbf{r}_a^*(\mathbf{y}^*)$  are two periodic vectors which characterize the fluctuation of temperature in both phases at the pore scale. Introducing (C3.27) and (C3.28) in the set (C3.17-C3.20), these two vectors are solution of the following boundary value

620 problem in a compact form:

$$\text{div}_{y^*} (k_i^* (\mathbf{grad}_{y^*} \mathbf{r}_i^* + \mathbf{I})) = 0 \quad \text{in } \Omega_i \quad (\text{C3.30})$$

$$\text{div}_{y^*} (k_a^* (\mathbf{grad}_{y^*} \mathbf{r}_a^* + \mathbf{I})) = 0 \quad \text{in } \Omega_a \quad (\text{C3.31})$$

$$625 \quad \mathbf{r}_i^* = \mathbf{r}_a^* \quad \text{on } \Gamma \quad (\text{C3.32})$$

$$(k_i^* (\mathbf{grad}_{y^*} \mathbf{r}_i^* + \mathbf{I}) - (k_a^* + L_{sg}^* D_v^* \frac{\gamma^*(T^{*(0)})}{\rho_i^*}) (\mathbf{grad}_{y^*} \mathbf{r}_a^* + \mathbf{I})) \cdot \mathbf{n}_i = 0 \quad \text{on } \Gamma \quad (\text{C3.33})$$

$$\frac{1}{|\Omega|} \int_{\Omega} (\mathbf{r}_a^* + \mathbf{r}_i^*) d\Omega = \mathbf{0} \quad (\text{C3.34})$$

630 This latter equation is introduced to ensure the uniqueness of the solution. This latter boundary value problem is similar as the one of (A.20)-(A.24) where  $k_a^*$  is now equal to  $k_a^* + L_{sg}^* D_v^* \gamma^*(T^{*(0)}) / \rho_i^*$ . At the local scale, the thermal conductivity appears to be enhanced by the phase change.

### S.3.3.2 Macroscopic description

Finally, the third order problem is given by Eq. (C3.1), (C3.2), (C3.4), and (C3.5) of order  $\varepsilon^2$ :

$$635 \quad \rho_i^* C_i^* \frac{\partial T^{*(0)}}{\partial t^*} - \operatorname{div}_{y^*} (k_i^* (\mathbf{grad}_{y^*} T_i^{*(2)} + \mathbf{grad}_{x^*} T_i^{*(1)})) - \operatorname{div}_{x^*} (k_i^* (\mathbf{grad}_{y^*} T_i^{*(1)} + \mathbf{grad}_{x^*} T^{*(0)})) = 0 \quad \text{in } \Omega_i \quad (\text{C3.35})$$

$$\rho_a^* C_a^* \frac{\partial T^{*(0)}}{\partial t^*} - \operatorname{div}_{y^*} (k_a^* (\mathbf{grad}_{y^*} T_a^{*(2)} + \mathbf{grad}_{x^*} T_a^{*(1)})) - \operatorname{div}_{x^*} (k_a^* (\mathbf{grad}_{y^*} T_a^{*(1)} + \mathbf{grad}_{x^*} T^{*(0)})) = 0 \quad \text{in } \Omega_a \quad (\text{C3.36})$$

$$T_i^{*(2)} = T_a^{*(2)} \quad \text{on } \Gamma \quad (\text{C3.37})$$

640

$$\begin{aligned} & (k_i^* (\mathbf{grad}_{y^*} T_i^{*(2)} + \mathbf{grad}_{x^*} T_i^{*(1)}) - k_a^* (\mathbf{grad}_{y^*} T_a^{*(2)} + \mathbf{grad}_{x^*} T_a^{*(1)})) \cdot \mathbf{n}_i = \\ & = L_{sg}^* \frac{D_v^*}{\rho_i^*} (\mathbf{grad}_{y^*} \rho_v^{*(2)} + \mathbf{grad}_{x^*} \rho_v^{*(1)}) \cdot \mathbf{n}_i \quad \text{on } \Gamma. \end{aligned} \quad (\text{C3.38})$$

where the unknowns  $T_i^{*(2)}(\mathbf{x}^*, \mathbf{y}^*, t)$  and  $T_a^{*(2)}(\mathbf{x}^*, \mathbf{y}^*, t)$  are  $\mathbf{y}^*$ -periodic. For the water vapor, the third order problem is given

645 by Eq. (C3.3) and (C3.6) of order  $\varepsilon^2$ :

$$\frac{\partial \rho_{vs}^{*(0)}}{\partial t^*} - \operatorname{div}_{y^*} (D_v^* (\mathbf{grad}_{y^*} \rho_v^{*(2)} + \mathbf{grad}_{x^*} \rho_v^{*(1)})) - \operatorname{div}_{x^*} (D_v^* (\mathbf{grad}_{y^*} \rho_v^{*(1)} + \mathbf{grad}_{x^*} \rho_{vs}^{*(0)} (T^{*(0)}))) = 0 \quad \text{in } \Omega_a \quad (\text{C3.39})$$

$$D_v^* (\mathbf{grad}_{y^*} \rho_v^{*(2)} + \mathbf{grad}_{x^*} \rho_v^{*(1)}) \cdot \mathbf{n}_i = \rho_i^* w_n^{*(4)} \quad \text{on } \Gamma \quad (\text{C3.40})$$

Integrating (C3.35) over  $\Omega_i$  and (C3.36) and (C3.39) over  $\Omega_a$ , and then using the divergence theorem, the periodicity condition,

650 and the boundary conditions (B2.40) leads to the first order dimensionless description:

$$(\rho C)^{\text{eff}*} \frac{\partial T^{*(0)}}{\partial t^*} - \operatorname{div}_{x^*} (\mathbf{k}^{\text{td}*} \mathbf{grad}_{x^*} T^{*(0)}) = \int_{\Gamma} L_{sg}^* \frac{D_v^*}{\rho_i^*} (\mathbf{grad}_{y^*} \rho_v^{*(2)} + \mathbf{grad}_{x^*} \rho_v^{*(1)}) \cdot \mathbf{n}_i dS = -L_{sg}^* \dot{\phi}. \quad (\text{C3.41})$$

where  $(\rho C)^{\text{eff}*}$  and  $\mathbf{k}^{\text{td}*}$  are the dimensionless effective thermal capacity and the apparent dimensionless thermal conductivity, respectively, defined as:

$$(\rho C)^{\text{eff}*} = (1 - \phi) \rho_i^* C_i^* + \phi \rho_a^* C_a^* \quad (\text{C3.42})$$

655

$$\mathbf{k}^{\text{td}*} = \frac{1}{|\Omega|} \left( \int_{\Omega_a} k_a^* (\mathbf{grad}_{y^*} \mathbf{r}_a^*(\mathbf{y}^*) + \mathbf{I}) d\Omega + \int_{\Omega_i} k_i^* (\mathbf{grad}_{y^*} \mathbf{r}_i^*(\mathbf{y}^*) + \mathbf{I}) d\Omega \right) \quad (\text{C3.43})$$

where  $\phi$  is the porosity. Integrating (C3.39) over  $\Omega_a$ , and then using the divergence theorem and the periodicity condition, leads to the first order dimensionless description:

$$\phi \frac{\partial \rho_{vs}^{*(0)}}{\partial t} - \operatorname{div}_{x^*} (\mathbf{D}^{\text{td}*} \mathbf{grad}_{x^*} \rho_{vs}^{*(0)}(T^{*(0)})) = - \int_{\Gamma} D_v^* (\mathbf{grad}_{y^*} \rho_v^{*(2)} + \mathbf{grad}_{x^*} \rho_v^{*(1)}) \cdot \mathbf{n}_i dS = \rho_i^* \dot{\phi}. \quad (\text{C3.44})$$

660 where  $\mathbf{D}^{\text{td}*}$  is the apparent effective diffusion tensor defined as:

$$\mathbf{D}^{\text{td}*} = \frac{1}{|\Omega|} \int_{\Omega_a} D_v^* (\mathbf{grad}_{y^*} \mathbf{r}_a^*(\mathbf{y}^*) + \mathbf{I}) d\Omega \quad (\text{C3.45})$$

## References

Auriault, J.-L., Boutin, C., and Geindreau, C.: Homogenization of coupled phenomena in heterogenous media, Wiley-ISTE, London, 2009.
